# Supplementary material for: Enantioselective conjugate addition of phenylboronic acid to enones catalysed by a chiral tropos/atropos rhodium complex at the coalescence temperature
Source: Royal Society of Chemistry journal article supplement (doi:10.1039/b508832a), 2005-01-01
Supplement: b508832a.pdf [file b508832a.pdf]

## ELECTRONIC SUPPORTING INFORMATION (ESI)

### Enantioselective Conjugate Addition of Phenylboronic Acid to Enones Catalyzed by a Chiral Tropos/Atropos Rhodium Complex at the Coalescence Temperature

Chiara Monti, Cesare Gennari,\* Umberto Piarulli\*

**General procedure for the synthesis of phosphites:**  $\text{PCl}_3$  (2 eq, 6 mmol, 525  $\mu\text{l}$ ) was added to a solution of the alcohol (1 eq, 3 mmol) in dichloromethane (17 ml), in a Schlenk tube, under argon, at room temperature. After stirring for 2 hours, the solvent and excess  $\text{PCl}_3$  were removed under reduced pressure. The resulting residue was dissolved in tetrahydrofuran (7 ml), and a solution of the biphenol (1 eq, 3 mmol) and triethylamine (3 eq, 9 mmol, 1.25 ml) in THF (10 ml) was slowly added. Upon addition, the formation of a white precipitate was immediately observed. The reaction mixture was stirred overnight, and then filtered over a PTFE membrane filter. The solvent was removed and the crude product was purified either by crystallisation or by chromatography, to give the desired compound as a white foamy solid.

**General procedure for the synthesis of phosphoramidites:** a solution of the amine (1 eq, 3 mmol) and triethylamine (1.13 eq, 3.4 mmol, 472.5  $\mu\text{l}$ ) in dry toluene (2.6 ml) was added to a solution of  $\text{PCl}_3$  (1 eq, 3 mmol, 262  $\mu\text{l}$ ) in toluene (38 ml), in a Schlenk tube, under argon. The reaction mixture was heated to 70°C for 6 hours, and then allowed to cool to room temperature. Triethylamine (2.26 eq, 6.78 mmol, 945  $\mu\text{l}$ ) was added, and the mixture was cooled to -78°C. A solution of biphenol (1 eq, 3 mmol) in a 4 : 1 toluene : THF mixture (7.5 ml) was slowly added. The reaction mixture was stirred overnight, while slowly warming to room temperature. The mixture was filtered over a pad of celite, and the solvent removed under reduced pressure. The crude product was purified either by crystallisation or by chromatography, to give the desired compound as a white powder.

Bis-[(*S*)-1-naphth-1-yl-ethyl]amine and bis-[(*R*)-1-naphth-1-yl-ethyl]amine were synthesised in two steps, as reported in the literature.<sup>1</sup> (*R,R*)-2,5-diphenylpyrrolidine and (*S,S*)-2,5-diphenylpyrrolidine were prepared following a literature procedure.<sup>2</sup> 3,3',5,5'-tetramethyl-biphenol<sup>3</sup> and 3,3',5,5'-tetra-*tert*-butyl-biphenol<sup>4</sup> were prepared following the reported procedures.

---

<sup>1</sup> A. Alexakis, S. Gille, F. Prian, S. Rosset and K. Ditrach, *Tetrahedron Lett.* 2004, **45**, 1449.

<sup>2</sup> D. J. Aldous, W. M. Dutton and P. G. Steel, *Tetrahedron: Asymmetry* 2000, **11**, 2455.

<sup>3</sup> A. Alexakis, D. Polet, S. Rosset and S. March, *J. Org. Chem.* 2004, **69**, 5660.

<sup>4</sup> D. H. R. Barton, S. Choi, B. Hu and J. A. Smith, *Tetrahedron* 1998, **54**, 3367.

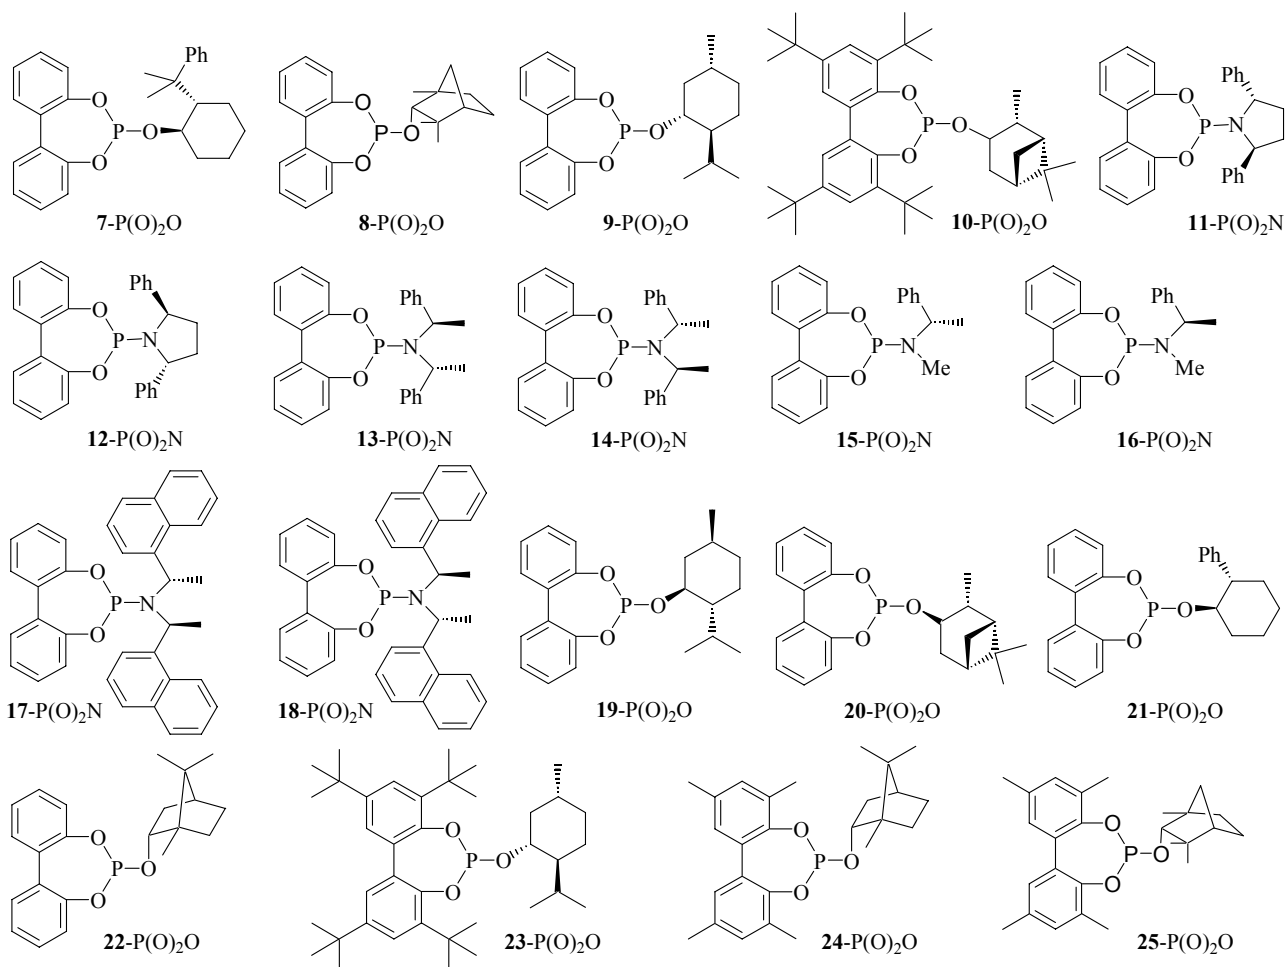

**7-P(O)<sub>2</sub>O**, Biphenol / (1*R*,2*S*)-(-)-*trans*-(1-methyl-1-phenylethyl)cyclohexanol: 79% yield;

<sup>1</sup>H-NMR (400 MHz, CDCl<sub>3</sub>): δ = 7.58-7.10 (m, 13H, ArH), 4.32-4.24 (m, 1H, CH), 2.28-2.24 (m, 1H, CH), 1.99-1.92 (m, 1H, CH), 1.76-1.56 (m, 3H, CH), 1.50 (s, 3H, CH<sub>3</sub>), 1.46 (s, 3H, CH<sub>3</sub>), 1.38-1.19 (m, 1H, CH); 1.19-0.88 (m, 3H, CH); <sup>13</sup>C-NMR (100 MHz, CDCl<sub>3</sub>): δ = 150.3, 149.6, 131.4, 129.9, 129.4, 129.0, 127.9, 126.0, 125.3, 124.9, 124.8, 122.2, 122.0, 121.0, 117.0, 77.5 (d, *J*<sub>C,P</sub> = 16 Hz), 52.6, 40.8, 36.8, 30.4, 27.6, 25.6, 24.8, 24.6; <sup>31</sup>P-NMR (162 MHz, CDCl<sub>3</sub>): δ = 153.4; m.p. = 128°C; IR (CCl<sub>4</sub>): ν<sub>max</sub> = 3065, 3031, 2935, 2859, 1943, 1553, 1499, 1476, 1437, 1260, 1210, 1187, 1098, 1016, 900, 847, 830 cm<sup>-1</sup>; [α]<sub>D</sub> = - 12.6 (c 1.00, CHCl<sub>3</sub>); HRMS (ESI) *m/z* calcd for [C<sub>27</sub>H<sub>29</sub>NaO<sub>3</sub>P]<sup>+</sup>: 455.1752 [M+Na]<sup>+</sup>; found: 455.1743; C<sub>27</sub>H<sub>29</sub>O<sub>3</sub>P calcd. C 74.98, H 6.76; found: C 72.39, H 6.90.

**8-P(O)<sub>2</sub>O**, Biphenol / (1*R*)-endo-(+)-fenchol: 78% yield;

<sup>1</sup>H-NMR (400 MHz, CDCl<sub>3</sub>): δ = 7.50 (d, *J* = 7.6 Hz, 2H, ArH), 7.44-7.21 (m, 6H, ArH), 3.96 (d, *J* = 11.6 Hz, 1H, CH), 1.85-1.67 (m, 4H, CH), 1.58-1.40 (m, 3H, CH), 1.24 (s, 3H, CH<sub>3</sub>), 1.04 (s, 3H, CH<sub>3</sub>), 0.96 (s, 3H, CH<sub>3</sub>); <sup>13</sup>C-NMR (100 MHz, CDCl<sub>3</sub>): δ = 130.5, 129.6, 125.6, 125.5, 122.9, 89.2 (d, *J*<sub>C,P</sub> = 12.0 Hz), 50.1, 48.8, 41.8, 40.4, 30.6, 26.7, 26.5, 22.2, 20.2; <sup>31</sup>P-NMR (162 MHz, CDCl<sub>3</sub>): δ = 148.6; m.p. = 104°C; IR (CCl<sub>4</sub>): ν<sub>max</sub> = 3069, 3030, 2962, 2873, 1944, 1911, 1602, 1569, 1556, 1499, 1476, 1437, 1260, 1210, 1187, 1098, 1015, 904, 857 cm<sup>-1</sup>; [α]<sub>D</sub> = + 9.8 (c 1.00, CHCl<sub>3</sub>); HRMS (ESI) *m/z* calcd for [C<sub>22</sub>H<sub>25</sub>NaO<sub>3</sub>P]<sup>+</sup>: 391.1439 [M+Na]<sup>+</sup>; found: 391.1423; C<sub>22</sub>H<sub>25</sub>O<sub>3</sub>P calcd. C 71.72, H 6.84; found: C 69.42, H 7.07.

**9-P(O)<sub>2</sub>O**, Biphenol / (1*R*, 2*S*, 5*R*)-(-)-menthol: 88% yield;

<sup>1</sup>H-NMR (400 MHz, CDCl<sub>3</sub>): δ = 7.49 (d, *J* = 7.6 Hz, 2H, ArH), 7.37 (t, *J* = 7.6 Hz, 2H, ArH), 7.30 (t, *J* = 7.5 Hz, 2H, ArH), 7.22-7.20 (m, 2H, ArH), 4.20-4.16 (m, 1H, CH), 2.32-2.27 (m, 1H, CH), 2.25-2.18 (m, 1H, CH), 1.73-1.69 (m, 2H, CH), 1.51-1.35 (m, 2H, CH), 1.08-1.04 (m, 3H, CH), 0.99 (d, *J* = 6.5 Hz, 3H, CH<sub>3</sub>), 0.96 (d, *J* = 7.0 Hz, 3H, CH<sub>3</sub>), 0.88 (d, *J* = 6.9 Hz, 3H, CH<sub>3</sub>); <sup>13</sup>C-NMR (100 MHz, CDCl<sub>3</sub>): δ = 156.0, 149.8, 131.8, 130.3, 129.4, 128.1, 125.4, 122.5, 120.3, 118.5, 76.7 (d, *J*<sub>C,P</sub> = 17.4 Hz), 48.9, 44.6, 34.5, 32.2, 25.7, 23.3, 22.5, 21.4, 16.0; <sup>31</sup>P-NMR (162 MHz, CDCl<sub>3</sub>): δ = 152.8; m.p. = 98°C; IR (CCl<sub>4</sub>): ν<sub>max</sub> = 3068, 3030, 2958, 2871, 1943, 1910, 1600, 1570, 1556, 1545, 1499, 1476, 1438, 1386, 1370, 1271, 1249, 1210, 1187, 1097, 1013, 992, 900 cm<sup>-1</sup>; [α]<sub>D</sub> = - 17.4 (c 1.00, CHCl<sub>3</sub>); HRMS (ESI) *m/z* calcd for [C<sub>22</sub>H<sub>27</sub>NaO<sub>3</sub>P]<sup>+</sup>: 393.1595 [M+Na]<sup>+</sup>; found: 393.1579; C<sub>22</sub>H<sub>27</sub>O<sub>3</sub>P calcd. C 71.33, H 7.35; found: C 71.23, H 7.32.

**10-P(O)<sub>2</sub>O**, 3,3',5,5'-tetra-*tert*-butyl-biphenol / (1*R*, 2*R*, 3*R*, 5*S*)-(-)-isopinocampheol: 87% yield;

<sup>1</sup>H-NMR (400 MHz, CDCl<sub>3</sub>): δ = 7.53-7.51 (m, 1H, ArH), 7.45-7.43 (m, 1H, ArH), 7.28-7.26 (m, 1H, ArH), 7.19-7.17 (m, 1H, ArH), 4.75-4.57 (m, 1H, CH), 2.59-2.52 (m, 1H, CH), 2.41-2.36 (m, 1H, CH), 2.27-2.23 (m, 1H, CH), 2.10-1.94 (m, 2H, CH), 1.87-1.84 (m, 1H, CH), 1.50 (s, 18H, *t*Bu), 1.45 (s, 3H, CH<sub>3</sub>), 1.36 (s, 18H, *t*Bu), 1.20 (d, *J* = 7.2 Hz, 3H, CH<sub>3</sub>), 1.06 (d, *J* = 10 Hz, 1H, CH), 0.89 (s, 3H, CH<sub>3</sub>); <sup>13</sup>C-NMR (100 MHz, CDCl<sub>3</sub>): δ = 127.0, 126.9, 125.4, 124.5, 76.7, 48.2, 46.0, 45.7, 42.0, 38.2, 33.9, 31.9, 31.8, 31.6, 27.9, 24.3, 20.5; <sup>31</sup>P-NMR (162 MHz, CDCl<sub>3</sub>): δ = 146.7; m.p. = 75°C; IR (CCl<sub>4</sub>): ν<sub>max</sub> = 2963, 2907, 2871, 2448, 1945, 1595, 1556, 1545, 1475, 1440, 1397, 1363, 1260, 1229, 1094, 1018, 937, 879 cm<sup>-1</sup>; [α]<sub>D</sub> = + 5.3 (c 1.00, CHCl<sub>3</sub>); HRMS (ESI) *m/z* calcd for [C<sub>38</sub>H<sub>57</sub>NaO<sub>3</sub>P]<sup>+</sup>: 615.3943 [M+Na]<sup>+</sup>; found: 615.3935; C<sub>38</sub>H<sub>57</sub>O<sub>3</sub>P calcd. C 76.99, H 9.69; found: C 77.02, H 9.71.

**11-P(O)-N**, Biphenol / (*S,S*)-2,5-diphenylpyrrolidine: 73% yield; [α]<sub>D</sub> = - 111.4 (c 1.03, CHCl<sub>3</sub>);

**12-P(O)<sub>2</sub>N**, Biphenol / (*R,R*)-2,5-diphenylpyrrolidine: 67% yield; [α]<sub>D</sub> = + 111.4 (c 1.03, CHCl<sub>3</sub>);

<sup>1</sup>H-NMR (400 MHz, CDCl<sub>3</sub>): δ = 7.50-6.96 (m, 18H, ArH), 5.10 (d, *J* = 5.6 Hz, 2H, CH), 2.51-2.38 (m, 2H, CH), 1.89-1.78 (m, 2H, CH); <sup>13</sup>C-NMR (100 MHz, CDCl<sub>3</sub>): δ = 144.1, 130.4, 129.9, 129.6, 129.2, 128.9, 127.5, 125.0, 124.4, 122.7, 122.2, 63.4, 63.1, 34.3, 33.0; <sup>31</sup>P-NMR (162 MHz, CDCl<sub>3</sub>): δ = 149.2; m.p. = 101°C; IR (CCl<sub>4</sub>): ν<sub>max</sub> = 3065, 3029, 2963, 2904, 1943, 1603, 1546, 1497, 1476, 1436, 1261, 1211, 1097, 1019, 829 cm<sup>-1</sup>; HRMS (ESI) *m/z* calcd for [C<sub>28</sub>H<sub>24</sub>NNaO<sub>2</sub>P]<sup>+</sup>: 460.1442 [M+Na]<sup>+</sup>; found: 460.1431; C<sub>28</sub>H<sub>24</sub>NO<sub>2</sub>P calcd. C 76.87, H 5.53, N 3.20; found: C 76.70, H 6.00, N 3.21.

**13-P(O)<sub>2</sub>N**, Biphenol / (*R,R*)-bis(α-methylbenzyl)amine: 89% yield; [α]<sub>D</sub> = + 238.0 (c 1.00, CHCl<sub>3</sub>);

**14-P(O)<sub>2</sub>N**, Biphenol / (*S,S*)-bis(α-methylbenzyl)amine: 80% yield; [α]<sub>D</sub> = - 238.0 (c 1.00, CHCl<sub>3</sub>);

<sup>1</sup>H-NMR (400 MHz, CDCl<sub>3</sub>): δ = 7.49-7.56 (m, 2H, ArH), 7.22-7.41 (m, 6H, ArH), 7.11-7.20 (m, 10H, ArH), 4.58-4.66 (m, 2H, 2 x H-benzyl), 1.77 (d, *J* = 7.2 Hz, 6H, 2 x CH<sub>3</sub>-benzyl); <sup>13</sup>C-NMR (100 MHz, CDCl<sub>3</sub>): δ = 151.5, 143.4, 131.6, 130.4, 130.2, 129.5, 129.4, 128.3, 128.2, 127.0, 125.0, 124.4, 122.9, 122.4, 53.1, 53.0, 22.7; <sup>31</sup>P-NMR (162 MHz, CDCl<sub>3</sub>): δ = 147.6; m.p. = 105°C; IR (CCl<sub>4</sub>): ν<sub>max</sub> = 3065, 3030, 2963, 2905, 1943, 1911, 1602, 1546, 1497, 1476, 1436, 1375, 1261, 1211, 1194, 1098, 1015, 889, 830 cm<sup>-1</sup>; HRMS (ESI) *m/z* calcd for [C<sub>28</sub>H<sub>26</sub>NNaO<sub>2</sub>P]<sup>+</sup>: 462.1599 [M+Na]<sup>+</sup>; found: 462.1574; C<sub>28</sub>H<sub>26</sub>NO<sub>2</sub>P calcd. C 76.52, H 5.96, N 3.19; found: C 76.60, H 5.97, N 3.21.

**15-P(O)<sub>2</sub>N**, Biphenol / (*S*)-(-)-*N*, $\alpha$ -dimethylbenzylamine: 55% yield;  $[\alpha]_D = +23.0$  (c 1.00, CHCl<sub>3</sub>);

**16-P(O)<sub>2</sub>N**, Biphenol / (*R*)-(+)-*N*, $\alpha$ -dimethylbenzylamine: 40% yield;  $[\alpha]_D = -23.0$  (c 1.00, CHCl<sub>3</sub>);

<sup>1</sup>H-NMR (400 MHz, CDCl<sub>3</sub>):  $\delta = 7.54$ - $7.09$  (m, 13H, ArH),  $4.92$ - $4.84$  (m, 1H, CH),  $2.23$  (d,  $J = 4.8$  Hz, 3H, CH<sub>3</sub>),  $1.69$  (d,  $J = 7.2$  Hz, 3H, CH<sub>3</sub>); <sup>13</sup>C-NMR (100 MHz, CDCl<sub>3</sub>):  $\delta = 152.3$ ,  $142.7$ ,  $131.6$ ,  $130.3$ ,  $129.8$ ,  $129.0$ ,  $128.0$ ,  $127.7$ ,  $125.1$ ,  $125.0$ ,  $122.6$ ,  $56.3$ ,  $55.9$ ,  $27.7$ ,  $19.2$ ; <sup>31</sup>P-NMR (162 MHz, CDCl<sub>3</sub>):  $\delta = 149.6$ ; m.p. =  $109^\circ\text{C}$ ; IR (CCl<sub>4</sub>):  $\nu_{\text{max}} = 3067$ ,  $3030$ ,  $2963$ ,  $2905$ ,  $1603$ ,  $1564$ ,  $1556$ ,  $1498$ ,  $1476$ ,  $1436$ ,  $1260$ ,  $1208$ ,  $1194$ ,  $1098$ ,  $1013$ ,  $934$  cm<sup>-1</sup>; HRMS (ESI)  $m/z$  calcd for [C<sub>21</sub>H<sub>20</sub>NNaO<sub>2</sub>P]<sup>+</sup>:  $372.1129$  [M+Na]<sup>+</sup>; found:  $372.1112$ ; C<sub>21</sub>H<sub>20</sub>NO<sub>2</sub>P calcd. C 72.20, H 5.77, N 4.01; found: C 72.31, H 5.79, N 3.98.

**17-P(O)<sub>2</sub>N**, Biphenol / bis-[(*S*)-1-naphth-1-yl-ethyl]amine: 60% yield;  $[\alpha]_D = +204.8$  (c 0.53, CHCl<sub>3</sub>);

**18-P(O)<sub>2</sub>N**, Biphenol / bis-[(*R*)-1-naphth-1-yl-ethyl]amine: 71% yield;  $[\alpha]_D = -204.8$  (c 0.53, CHCl<sub>3</sub>);

<sup>1</sup>H-NMR (400 MHz, CDCl<sub>3</sub>):  $\delta = 7.95$  (d,  $J = 8.0$  Hz, 2H, ArH),  $7.62$ - $7.22$  (m, 18H, ArH),  $6.86$  (t,  $J = 7.6$  Hz, 2H, ArH),  $5.61$ - $5.53$  (m, 2H, 2 x CH),  $1.83$  (d,  $J = 7.2$  Hz, 6H, 2 x CH<sub>3</sub>); <sup>13</sup>C-NMR (100 MHz, CDCl<sub>3</sub>):  $\delta = 139.1$ ,  $133.8$ ,  $131.5$ ,  $130.9$ ,  $130.8$ ,  $129.9$ ,  $129.8$ ,  $129.0$ ,  $127.6$ ,  $125.9$ ,  $125.5$ ,  $125.3$ ,  $125.2$ ,  $124.7$ ,  $123.9$ ,  $123.1$ ,  $123.0$ ,  $51.5$ ,  $51.4$ ,  $23.7$ ,  $23.6$ ; <sup>31</sup>P-NMR (162 MHz, CDCl<sub>3</sub>):  $\delta = 150.1$ ; m.p. not determined due to decomposition; IR (CCl<sub>4</sub>):  $\nu_{\text{max}} = 3053$ ,  $2964$ ,  $2905$ ,  $2876$ ,  $1943$ ,  $1912$ ,  $1600$ ,  $1566$ ,  $1499$ ,  $1476$ ,  $1435$ ,  $1396$ ,  $1373$ ,  $1262$ ,  $1212$ ,  $1194$ ,  $1175$ ,  $1142$ ,  $1098$ ,  $1016$ ,  $960$ ,  $891$ ,  $850$  cm<sup>-1</sup>; HRMS (ESI)  $m/z$  calcd for [C<sub>36</sub>H<sub>30</sub>NNaO<sub>2</sub>P]<sup>+</sup>:  $562.1912$  [M+Na]<sup>+</sup>; found:  $562.1910$ ; C<sub>36</sub>H<sub>30</sub>NO<sub>2</sub>P calcd. C 80.13, H 5.60, N 2.60; found: C 80.15, H 5.63, N 2.59.

**19-P(O)<sub>2</sub>O**, Biphenol / (1*S*, 2*R*, 5*S*)-(+)-menthol: 97% yield;

<sup>1</sup>H-NMR (400 MHz, CDCl<sub>3</sub>):  $\delta = 7.49$  (d,  $J = 7.6$  Hz, 2H, ArH),  $7.37$  (t,  $J = 7.6$  Hz, 2H, ArH),  $7.30$  (t,  $J = 7.5$  Hz, 2H, ArH),  $7.22$ - $7.20$  (m, 2H, ArH),  $4.20$ - $4.16$  (m, 1H, CH),  $2.32$ - $2.27$  (m, 1H, CH),  $2.25$ - $2.18$  (m, 1H, CH),  $1.73$ - $1.69$  (m, 2H, CH),  $1.51$ - $1.35$  (m, 2H, CH),  $1.08$ - $1.04$  (m, 3H, CH),  $0.99$  (d,  $J = 6.5$  Hz, 3H, CH<sub>3</sub>),  $0.96$  (d,  $J = 7.0$  Hz, 3H, CH<sub>3</sub>),  $0.88$  (d,  $J = 6.9$  Hz, 3H, CH<sub>3</sub>); <sup>13</sup>C-NMR (100 MHz, CDCl<sub>3</sub>):  $\delta = 156.0$ ,  $149.8$ ,  $131.8$ ,  $130.3$ ,  $129.4$ ,  $128.1$ ,  $125.4$ ,  $122.5$ ,  $120.3$ ,  $118.5$ ,  $76.7$  (d,  $J_{\text{C,P}} = 17.4$  Hz),  $48.9$ ,  $44.6$ ,  $34.5$ ,  $32.2$ ,  $25.7$ ,  $23.3$ ,  $22.5$ ,  $21.4$ ,  $16.0$ ; <sup>31</sup>P-NMR (162 MHz, CDCl<sub>3</sub>):  $\delta = 152.8$ ; m.p. =  $98^\circ\text{C}$ ; IR (CCl<sub>4</sub>):  $\nu_{\text{max}} = 3068$ ,  $3030$ ,  $2958$ ,  $2871$ ,  $1943$ ,  $1910$ ,  $1600$ ,  $1570$ ,  $1556$ ,  $1545$ ,  $1499$ ,  $1476$ ,  $1438$ ,  $1386$ ,  $1370$ ,  $1271$ ,  $1249$ ,  $1210$ ,  $1187$ ,  $1097$ ,  $1013$ ,  $992$ ,  $900$  cm<sup>-1</sup>;  $[\alpha]_D = +17.4$  (c 1.00, CHCl<sub>3</sub>); HRMS (ESI)  $m/z$  calcd for [C<sub>22</sub>H<sub>27</sub>NaO<sub>3</sub>P]<sup>+</sup>:  $393.1595$  [M+Na]<sup>+</sup>; found:  $393.1579$ ; C<sub>22</sub>H<sub>27</sub>O<sub>3</sub>P calcd. C 71.33, H 7.35; found: C 71.23, H 7.32.

**20-P(O)<sub>2</sub>O**, Biphenol / (1*R*, 2*R*, 3*R*, 5*S*)-(-)-isopinocampheol: 76% yield;

<sup>1</sup>H-NMR (400 MHz, CDCl<sub>3</sub>):  $\delta = 7.49$  (d,  $J = 7.6$  Hz, 2H, ArH),  $7.38$  (t,  $J = 7.6$  Hz, 2H, ArH),  $7.29$  (t,  $J = 7.6$  Hz, 2H, ArH),  $7.21$  (t,  $J = 7.6$  Hz, 2H, ArH),  $4.77$ - $4.69$  (m, 1H, CH),  $2.59$ - $2.52$  (m, 1H, CH),  $2.41$ - $2.36$  (m, 1H, CH),  $2.27$ - $2.23$  (m, 1H, CH),  $2.10$ - $2.03$  (m, 1H, CH),  $1.99$ - $1.97$  (m, 1H, CH),  $1.87$ - $1.84$  (m, 1H, CH),  $1.25$  (s, 3H, CH<sub>3</sub>),  $1.20$  (d,  $J = 7.2$  Hz, 3H, CH<sub>3</sub>),  $1.15$  (d,  $J = 10$  Hz, 1H, CH),  $0.91$  (s, 3H, CH<sub>3</sub>); <sup>13</sup>C-NMR (100 MHz, CDCl<sub>3</sub>):  $\delta = 150.0$ ,  $130.4$ ,  $129.4$ ,  $125.4$ ,  $122.6$ ,  $122.4$ ,  $76.1$  (d,  $J_{\text{C,P}} = 15$  Hz),  $48.2$ ,  $46.1$ ,  $42.0$ ,  $38.8$ ,  $38.2$ ,  $34.4$ ,  $28.0$ ,  $24.3$ ,  $20.4$ ; <sup>31</sup>P-NMR (162 MHz, CDCl<sub>3</sub>):  $\delta = 147.7$ ; m.p. =  $106^\circ\text{C}$ ; IR (CCl<sub>4</sub>):  $\nu_{\text{max}} = 3069$ ,  $3029$ ,  $2959$ ,  $2910$ ,  $2872$ ,  $1943$ ,  $1911$ ,  $1601$ ,  $1567$ ,  $1553$ ,  $1499$ ,  $1476$ ,  $1437$ ,  $1386$ ,  $1370$ ,  $1260$ ,  $1249$ ,  $1210$ ,  $1187$ ,  $1097$ ,  $996$ ,  $942$ ,  $897$ ,  $857$  cm<sup>-1</sup>;  $[\alpha]_D = -17.0$  (c 1.00, CHCl<sub>3</sub>); HRMS (ESI)  $m/z$  calcd for [C<sub>22</sub>H<sub>27</sub>NaO<sub>4</sub>P]<sup>+</sup>:  $409.1545$  [M+Na+H<sub>2</sub>O]<sup>+</sup>; found:  $409.1538$ ; C<sub>22</sub>H<sub>25</sub>O<sub>3</sub>P calcd. C 71.72, H 6.84; found: C 71.80, H 6.86.

**21**-P(O)<sub>2</sub>O, Biphenol / (1*R*,2*S*)-(-)-*trans*-2-phenyl-1-cyclohexanol: 63% yield;

<sup>1</sup>H-NMR (400 MHz, C<sub>6</sub>D<sub>6</sub>): δ = 7.46-6.90 (m, 12H, ArH), 6.50-6.40 (m, 1H, ArH), 4.50-4.38 (m, 1H, CyH), 2.80-2.65 (m, 1H, CyH), 2.35-2.20 (m, 1H, CyH), 2.10-1.20 (m, 7H, CyH); <sup>13</sup>C-NMR (100 MHz, C<sub>6</sub>D<sub>6</sub>): δ = 149.9, 143.9, 130.4, 130.1, 129.5, 129.4, 129.1, 129.0, 128.4, 127.3, 125.5, 125.4, 122.8, 122.7, 79.3 (d, *J*<sub>C,P</sub> = 17 Hz), 52.2, 36.0, 34.5, 26.3, 25.7; <sup>31</sup>P-NMR (162 MHz, CDCl<sub>3</sub>): δ = 151.5; m.p. = 117°C; IR (CCl<sub>4</sub>): ν<sub>max</sub> = 3066, 3031, 2961, 2936, 2859, 1942, 1911, 1604, 1556, 1498, 1476, 1437, 1260, 1250, 1210, 1187, 1097, 1025, 901, 855, 831 cm<sup>-1</sup>; [α]<sub>D</sub> = - 53.6 (c 1.00, CHCl<sub>3</sub>); HRMS (ESI) *m/z* calcd for [C<sub>24</sub>H<sub>25</sub>NaO<sub>4</sub>P]<sup>+</sup>: 431.1388 [M+Na+H<sub>2</sub>O]<sup>+</sup>; found: 431.1370; C<sub>24</sub>H<sub>23</sub>O<sub>3</sub>P calcd. C 73.83, H 5.94; found: C 71.15, H 6.16.

**22**-P(O)<sub>2</sub>O, Biphenol / (-)-borneol: 82% yield;

<sup>1</sup>H-NMR (400 MHz, CDCl<sub>3</sub>): δ = 7.49 (d, *J* = 7.6 Hz, 2H, ArH), 7.40-7.36 (m, 2H, ArH), 7.30-7.26 (m, 2H, ArH), 7.20 (d, *J* = 8.0 Hz, 2H, ArH), 4.62-4.56 (m, 1H, CH), 2.26-2.18 (m, 1H, CH), 2.06-2.00 (m, 1H, CH), 1.87-1.62 (m, 2H, CH), 1.32-1.24 (m, 3H, CH), 0.94 (s, 3H, CH<sub>3</sub>), 0.88 (s, 3H, CH<sub>3</sub>), 0.77 (s, 3H, CH<sub>3</sub>); <sup>13</sup>C-NMR (100 MHz, CDCl<sub>3</sub>): δ = 150.2, 131.6, 131.5, 130.3, 129.4, 129.3, 125.3, 122.5, 81.5, 50.2, 48.1, 45.4, 38.4, 28.5, 26.9, 20.4, 19.0, 13.8; <sup>31</sup>P-NMR (162 MHz, CDCl<sub>3</sub>): δ = 145.4; m.p. = 88°C; IR (CCl<sub>4</sub>): ν<sub>max</sub> = 3069, 3030, 2961, 2881, 2453, 1943, 1601, 1499, 1476, 1438, 1264, 1210, 1188, 1097, 891, 858 cm<sup>-1</sup>; [α]<sub>D</sub> = - 5.5 (c 1.00, CHCl<sub>3</sub>); HRMS (ESI) *m/z* calcd for [C<sub>22</sub>H<sub>25</sub>NaO<sub>3</sub>P]<sup>+</sup>: 391.1439 [M+Na]<sup>+</sup>; found: 391.1427; C<sub>22</sub>H<sub>25</sub>O<sub>3</sub>P calcd. C 71.72, H 6.84; found: C 71.78, H 6.87.

**23**-P(O)<sub>2</sub>O, 3,3',5,5'-tetra-*tert*-butyl-biphenol / (1*R*, 2*S*, 5*R*)-(-)-menthol: 84% yield;

<sup>1</sup>H-NMR (400 MHz, CDCl<sub>3</sub>): δ = 7.44 (s, 1H, ArH), 7.43 (s, 1H, ArH), 7.19 (s, 1H, ArH), 7.18 (s, 1H, ArH), 4.11-4.06 (m, 1H, CH), 2.25-2.15 (m, 1H, CH), 2.10-1.80 (m, 2H, CH), 1.70-1.55 (m, 2H, CH), 1.50 (s, 18H, 2 x *t*Bu), 1.50-0.60 (m, 4H, CH), 1.36 (s, 18H, 2 x *t*Bu), 0.87-0.84 (m, 6H, 2 x CH<sub>3</sub>), 0.73 (d, *J* = 6.9 Hz, 3H, CH<sub>3</sub>); <sup>13</sup>C-NMR (100 MHz, CDCl<sub>3</sub>): δ = 150.0, 131.7, 130.3, 129.4, 125.4, 122.5, 79.1, 76.7, 76.6, 58.3, 48.9, 44.5, 34.5, 32.2, 25.7, 23.3, 22.5, 21.4, 16.0; <sup>31</sup>P-NMR (162 MHz, CDCl<sub>3</sub>): δ = 147.0; m.p. = 140°C; IR (CCl<sub>4</sub>): ν<sub>max</sub> = 2962, 2870, 1595, 1558, 1547, 1456, 1413, 1396, 1362, 1093, 1017 cm<sup>-1</sup>; [α]<sub>D</sub> = - 17.3 (c 1.00, CHCl<sub>3</sub>); HRMS (ESI) *m/z* calcd for [C<sub>38</sub>H<sub>59</sub>NaO<sub>3</sub>P]<sup>+</sup>: 617.4099 [M+Na]<sup>+</sup>; found: 617.4093; C<sub>38</sub>H<sub>59</sub>O<sub>3</sub>P calcd. C 76.73, H 10.00; found: C 76.69, H 9.97.

**24**-P(O)<sub>2</sub>O, 3,3',5,5'-tetramethyl-biphenol / (-)-borneol: 76% yield;

<sup>1</sup>H-NMR (400 MHz, CDCl<sub>3</sub>): δ = 7.13 (s, 2H, ArH), 7.08 (s, 2H, ArH), 4.65-4.60 (m, 1H, CH), 2.40 (s, 12H, 4 x CH<sub>3</sub>), 2.27-2.20 (m, 1H, CH), 2.07-2.00 (m, 1H, CH), 1.76-1.67 (m, 2H, CH), 1.33-1.23 (m, 3H, CH), 0.96 (s, 3H, CH<sub>3</sub>), 0.91 (s, 3H, CH<sub>3</sub>), 0.86 (s, 3H, CH<sub>3</sub>); <sup>13</sup>C-NMR (100 MHz, CDCl<sub>3</sub>): δ = 134.2, 131.6, 130.6, 128.6, 81.8 (d, *J*<sub>C,P</sub> = 12.0 Hz), 50.5, 48.4, 45.7, 38.5, 28.9, 27.3, 21.6, 20.8, 19.4, 17.5, 14.1; <sup>31</sup>P-NMR (162 MHz, CDCl<sub>3</sub>): δ = 145.7; m.p. = 81°C; IR (CCl<sub>4</sub>): ν<sub>max</sub> = 2957, 2880, 1557, 1478, 1260, 1245, 1214, 1188, 1154, 1119, 1030, 866, 830 cm<sup>-1</sup>; [α]<sub>D</sub> = + 2.5 (c 1.01, CHCl<sub>3</sub>); HRMS (ESI) *m/z* calcd for [C<sub>26</sub>H<sub>35</sub>NaO<sub>4</sub>P]<sup>+</sup>: 465.2171 [M+Na+H<sub>2</sub>O]<sup>+</sup>; found: 465.2141; C<sub>26</sub>H<sub>33</sub>O<sub>3</sub>P calcd. C 73.56, H 7.84; found: C 72.15, H 8.06.

**25**-P(O)<sub>2</sub>O, 3,3',5,5'-tetramethyl-biphenol / (1*R*)-endo-(+)-fenchol: 78% yield;

<sup>1</sup>H-NMR (400 MHz, CDCl<sub>3</sub>): δ = 7.13 (d, *J* = 7.2 Hz, 2H, ArH), 7.08 (s, 2H, ArH), 3.94 (dd, *J*<sub>1</sub> = 12.0, *J*<sub>2</sub> = 1.6 Hz, 1H, CH), 2.41 (s, 6H, 2 x CH<sub>3</sub>), 2.40 (s, 6H, 2 x CH<sub>3</sub>), 1.84-1.69 (m, 4H, CH), 1.59-1.43 (m, 3H, CH), 1.21 (s, 3H,

Supplementary Material (ESI) for Chemical Communications  
This journal is © The Royal Society of Chemistry 2005

$\text{CH}_3$ ), 1.09 (s, 3H,  $\text{CH}_3$ ), 0.90 (s, 3H,  $\text{CH}_3$ );  $^{13}\text{C}$ -NMR (100 MHz,  $\text{CDCl}_3$ ):  $\delta$  = 146.9, 146.4, 134.3, 132.0, 131.7, 131.5, 130.7, 128.6, 88.8 (d,  $J_{\text{C,P}}$  = 15.0 Hz), 50.0, 48.7, 41.9, 40.4, 30.8, 26.9, 26.4, 22.4, 21.6, 20.1, 17.7, 17.5;  $^{31}\text{P}$ -NMR (162 MHz,  $\text{CDCl}_3$ ):  $\delta$  = 149.7; m.p. = 91°C; IR ( $\text{CCl}_4$ )  $\nu_{\text{max}}$  2962, 2872, 1945, 1557, 1478, 1260, 1214, 1187, 1154, 1098, 1012, 871, 831  $\text{cm}^{-1}$ ;  $[\alpha]_{\text{D}}$  = - 27.5 (c 1.01,  $\text{CHCl}_3$ ); HRMS (ESI)  $m/z$  calcd for  $[\text{C}_{26}\text{H}_{35}\text{NaO}_4\text{P}]^+$ : 465.2171  $[\text{M}+\text{Na}+\text{H}_2\text{O}]^+$ ; found: 465.2153;  $\text{C}_{26}\text{H}_{33}\text{O}_3\text{P}$  calcd. C 73.56, H 7.84; found: C 72.39, H 7.98.

**Rh-catalysed asymmetric 1,4-conjugate addition of phenyl boronic acid to 2-cyclohexen-1-one. Synthesis of 3-phenylcyclohexan-1-one:** the reaction was performed using standard Schlenk techniques, under argon. The ligands **7**-P(O)<sub>2</sub>O (0.03 eq, 0.03 mmol, 12.9 mg) and **11**-P(O)<sub>2</sub>N (0.03 eq, 0.03 mmol, 13.1 mg) and [Rh(eth)<sub>2</sub>Cl]<sub>2</sub> (0.015 eq, 0.015 mmol, 5.8 mg) were weighed and 2.5 ml of degassed dioxane were added. After 30 min. under stirring, a solution of phenyl boronic acid (2 eq, 2 mmol, 243.8 mg) in 1.5 ml of dioxane was added, followed by 0.5 ml of a 2M solution of KOH (1 eq, 1 mmol) in water. A solution of 2-cyclohexen-1-one (1 eq, 1 mmol, 103 μl) in dioxane (1 ml) was added, and the reaction mixture was stirred overnight under argon, at room temperature. The reaction mixture was quenched with a satd. aqueous NaHCO<sub>3</sub> solution, and extracted with diethyl ether. The combined organic extracts were dried and evaporated in vacuo, to give a yellow oil. The crude product was purified by flash chromatography (eluent: hexane / ethyl acetate = 10 / 1) to yield 3-phenylcyclohexan-1-one as a yellow oil (0.95 mmol, 165.4 mg, isolated yield: 95%). 3-phenylcyclohexan-1-one: [α]<sub>D</sub> = + 20.5 (c 0.985, CHCl<sub>3</sub>);<sup>5</sup> 94.7% optical purity (*R*).

The enantiomeric excess of 3-phenylcyclohexan-1-one was determined by GC equipped with a chiral capillary column (MEGADEX DACTBSβ, diacetyl-*t*-butylsilyl-β-cyclodextrin OV 1701, 25 m, film 0.25 μm): 95% ee (*R*).

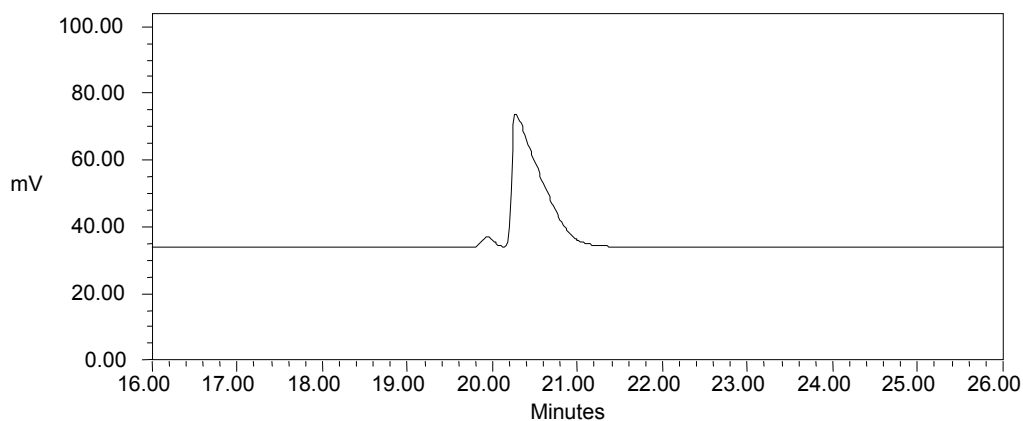

(*S*)-3-phenylcyclohexan-1-one: 19.9 min.

(*R*)-3-phenylcyclohexan-1-one: 20.3 min.

<sup>5</sup> [α]<sub>D</sub> = - 21 (c 0.96, CHCl<sub>3</sub>) was reported for (*S*)-3-phenylcyclohexanone (97% ee), see: Y. Takaya, M. Ogasawara and T. Hayashi, *J. Am. Chem. Soc.* 1998, **120**, 5579, and references therein.

**Rh-catalysed asymmetric 1,4-conjugate addition of phenyl boronic acid to 2-cyclohepten-1-one. Synthesis of 3-phenylcycloheptan-1-one:** the reaction was performed using standard Schlenk techniques, under argon. The ligands **7**-P(O)<sub>2</sub>O (0.03 eq, 0.03 mmol, 12.9 mg) and **11**-P(O)<sub>2</sub>N (0.03 eq, 0.03 mmol, 13.1 mg) and [Rh(eth)<sub>2</sub>Cl]<sub>2</sub> (0.015 eq, 0.015 mmol, 5.8 mg) were weighed and 2.5 ml of degassed dioxane were added. After 30 min. under stirring, a solution of phenyl boronic acid (2 eq, 2 mmol, 243.8 mg) in 1.5 ml of dioxane was added, followed by 0.5 ml of a 2M solution of KOH (1 eq, 1 mmol) in water. A solution of 2-cyclohepten-1-one (1 eq, 1 mmol, 111.5 μl) in dioxane (1 ml) was added, and the reaction mixture was stirred overnight under argon, at room temperature. The reaction mixture was quenched with a satd. aqueous NaHCO<sub>3</sub> solution, and extracted with diethyl ether. The combined organic extracts were dried and evaporated in vacuo, to give a yellow oil. The crude product was purified by flash chromatography (eluent: hexane / ethyl acetate = 10 / 1) to yield 3-phenylcycloheptan-1-one as a yellow oil (0.97 mmol, 182.5 mg, isolated yield: 97%). 3-phenylcycloheptan-1-one: [α]<sub>D</sub> = + 56.0 (c 0.75, CHCl<sub>3</sub>),<sup>6</sup> 89.8% optical purity (*R*). The absolute configuration was tentatively assigned as (*R*) by analogy with the other cases.

The enantiomeric excess of 3-phenylcycloheptan-1-one was determined by GC equipped with a chiral capillary column (MEGADEX DACTBSβ, diacetyl-*t*-butylsilyl-β-cyclodextrin OV 1701, 25 m, film 0.25 μm): 90% ee (*R*).

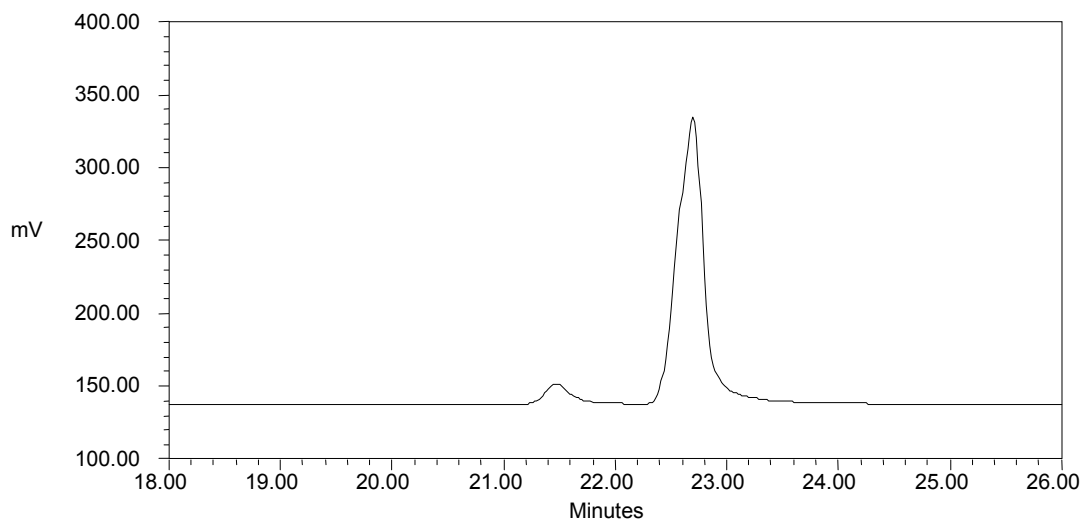

(*S*)-3-phenylcycloheptan-1-one: 21.5 min.

(*R*)-3-phenylcycloheptan-1-one: 22.7 min.

<sup>6</sup> [α]<sub>D</sub> = - 58 (c 0.75, CHCl<sub>3</sub>) was reported for 3-phenylcycloheptanone (93% ee), see: Y. Takaya, M. Ogasawara and T. Hayashi, *J. Am. Chem. Soc.* 1998, **120**, 5579, and references therein.



**Rh-catalysed asymmetric 1,4-conjugate addition of phenyl boronic acid to 2-cyclopenten-1-one. Synthesis of 3-phenylcyclopentan-1-one:** the reaction was performed using standard Schlenk techniques, under argon. The ligands **7**-P(O)<sub>2</sub>O (0.03 eq, 0.03 mmol, 12.9 mg) and **11**-P(O)<sub>2</sub>N (0.03 eq, 0.03 mmol, 13.1 mg) and [Rh(eth)<sub>2</sub>Cl]<sub>2</sub> (0.015 eq, 0.015 mmol, 5.8 mg) were weighed and 2.5 ml of degassed dioxane were added. After 30 min. under stirring, a solution of phenyl boronic acid (2 eq, 2 mmol, 243.8 mg) in 1.5 ml of dioxane was added, followed by 0.5 ml of a 2M solution of KOH (1 eq, 1 mmol) in water. A solution of 2-cyclopenten-1-one (1 eq, 1 mmol, 83.7 μl) in dioxane (1 ml) was added, and the reaction mixture was stirred overnight under argon, at room temperature. The reaction mixture was quenched with a satd. aqueous NaHCO<sub>3</sub> solution, and extracted with diethyl ether. The combined organic extracts were dried and evaporated in vacuo, to give a yellow oil. The crude product was purified by flash chromatography (eluent: hexane / ethyl acetate = 10 / 1) to yield 3-phenylcyclopentan-1-one as a yellow oil (0.95 mmol, 165.4 mg, isolated yield: 95%). 3-phenyl cyclopentan-1-one: [α]<sub>D</sub> = + 74.2 (c 0.81, CHCl<sub>3</sub>);<sup>7</sup> 78.2% optical purity (*R*). The enantiomeric excess of 3-phenylcyclopentan-1-one was determined by GC equipped with a chiral capillary column (Supelco γ-DEX 225, 25 m, film 0.25 μm): 73% ee (*R*).

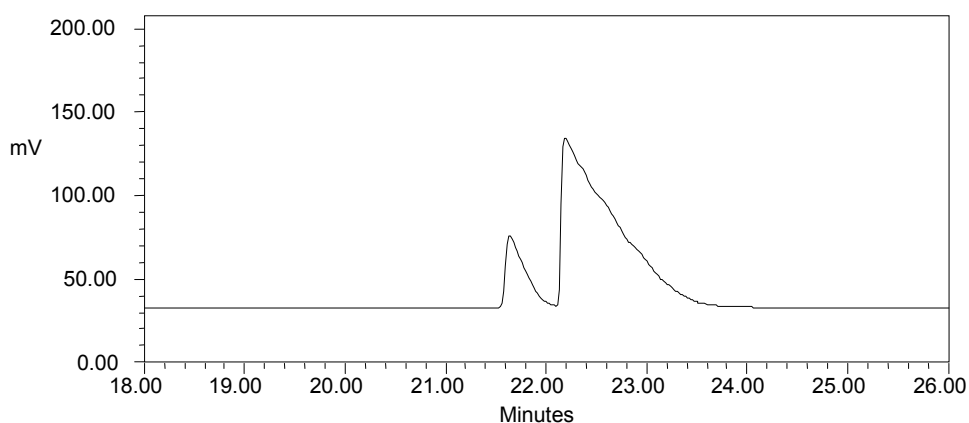

(*S*)-3-phenylcyclopentan-1-one: 21.6 min.

(*R*)-3-phenylcyclopentan-1-one: 22.2 min.

<sup>7</sup> [α]<sub>D</sub> = - 92 (c 0.82, CHCl<sub>3</sub>) was reported for (*S*)-3-phenylcyclopentanone (97% ee), see: Y. Takaya, M. Ogasawara and T. Hayashi, *J. Am. Chem. Soc.* 1998, **120**, 5579, and references therein.

**General procedure for the ligand library screening:** in flame-dried flasks, stock solutions were freshly prepared: a 0.006M solution of  $[\text{Rh}(\text{eth})_2\text{Cl}]_2$  (0.024 mmol, 9.33 mg) in degassed dioxane (4 ml); a 1.33M solution of phenyl boronic acid (3.2 mmol, 390.4 mg) in dioxane (2.4 ml); a solution of the appropriate cyclic enone (1.6 mmol) in dioxane (1.6 ml). The reactions were performed using standard Schlenk techniques. Seven flame-dried glass test tubes with stirring bars were placed in a Schlenk, under argon. In each test tube, the ligands (0.06 eq, 0.006 mmol of  $\text{L}^{\text{a}}$  and 0.006 mmol of  $\text{L}^{\text{b}}$ ) were weighed and 0.5 ml of the stock solution of  $[\text{Rh}(\text{eth})_2\text{Cl}]_2$  (0.015 eq, 0.003 mmol) were added, under argon. After 30 min. under stirring, 0.3 ml of the stock solution of phenyl boronic acid (2 eq, 0.4 mmol) were added, followed by 0.1 ml of a 2M solution of KOH (1 eq, 0.2 mmol) in water and 0.2 ml of the stock solution of the cyclic enone (1 eq, 0.2 mmol). The reaction mixtures were stirred overnight under argon, at room temperature. *n*-Tridecane (0.04 mmol) was added to each test tube, and the reaction mixtures were quenched with a satd. aqueous  $\text{NaHCO}_3$  solution, and extracted with diethyl ether. The crude mixtures in diethyl ether were directly analyzed by GC equipped with a chiral capillary column, using *n*-tridecane as internal standard: yields and ee's were determined by integration of the GC traces.

3-phenylcyclohexan-1-one and 3-phenylcycloheptan-1-one: MEGADEX DACTBS $\beta$ , diacetyl-*t*-butylsilyl- $\beta$ -cyclodextrin OV 1701, 25 m, film 0.25  $\mu\text{m}$ .

3-phenylcyclopentan-1-one: Supelco  $\gamma$ -DEX 225, 25 m, film 0.25  $\mu\text{m}$ .

Rh-catalysed asymmetric 1,4-conjugate addition of phenyl boronic acid to 2-cyclohexen-1-one: Ligand library screening.

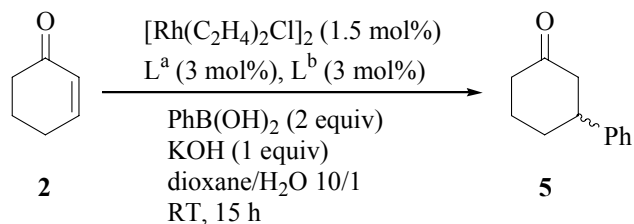

| Entry | Ligand $\text{L}^{\text{a}}$ | Ligand $\text{L}^{\text{b}}$ | Yield (%) | ee (%) | Abs. Config. |
|-------|------------------------------|------------------------------|-----------|--------|--------------|
| 1     | 7-P(O) <sub>2</sub> O        | 7-P(O) <sub>2</sub> O        | 100       | 70     | <i>R</i>     |
| 2     | 8-P(O) <sub>2</sub> O        | 8-P(O) <sub>2</sub> O        | 100       | 28     | <i>R</i>     |
| 3     | 9-P(O) <sub>2</sub> O        | 9-P(O) <sub>2</sub> O        | 100       | 8      | <i>R</i>     |
| 4     | 10-P(O) <sub>2</sub> O       | 10-P(O) <sub>2</sub> O       | 60        | rac    | -            |
| 5     | 11-P(O) <sub>2</sub> N       | 11-P(O) <sub>2</sub> N       | 100       | 36     | <i>R</i>     |
| 6     | 12-P(O) <sub>2</sub> N       | 12-P(O) <sub>2</sub> N       | 100       | 36     | <i>S</i>     |
| 7     | 13-P(O) <sub>2</sub> N       | 13-P(O) <sub>2</sub> N       | 56        | 3      | <i>S</i>     |
| 8     | 14-P(O) <sub>2</sub> N       | 14-P(O) <sub>2</sub> N       | 56        | 3      | <i>R</i>     |
| 9     | 15-P(O) <sub>2</sub> N       | 15-P(O) <sub>2</sub> N       | 90        | 7      | <i>R</i>     |
| 10    | 16-P(O) <sub>2</sub> N       | 16-P(O) <sub>2</sub> N       | 90        | 7      | <i>S</i>     |
| 11    | 17-P(O) <sub>2</sub> N       | 17-P(O) <sub>2</sub> N       | 30        | rac    | -            |
| 12    | 18-P(O) <sub>2</sub> N       | 18-P(O) <sub>2</sub> N       | 30        | rac    | -            |
| 13    | 19-P(O) <sub>2</sub> O       | 19-P(O) <sub>2</sub> O       | 100       | 8      | <i>S</i>     |
| 14    | 20-P(O) <sub>2</sub> O       | 20-P(O) <sub>2</sub> O       | 100       | 28     | <i>S</i>     |
| 15    | 21-P(O) <sub>2</sub> O       | 21-P(O) <sub>2</sub> O       | 100       | 41     | <i>R</i>     |
| 16    | 22-P(O) <sub>2</sub> O       | 22-P(O) <sub>2</sub> O       | 100       | 19     | <i>R</i>     |
| 17    | 23-P(O) <sub>2</sub> O       | 23-P(O) <sub>2</sub> O       | 0         | -      | -            |
| 18    | 24-P(O) <sub>2</sub> O       | 24-P(O) <sub>2</sub> O       | 50        | 8      | <i>S</i>     |
| 19    | 25-P(O) <sub>2</sub> O       | 25-P(O) <sub>2</sub> O       | 100       | 7      | <i>R</i>     |
| 20    | 7-P(O) <sub>2</sub> O        | 11-P(O) <sub>2</sub> N       | 100       | 95     | <i>R</i>     |
| 21    | 7-P(O) <sub>2</sub> O        | 12-P(O) <sub>2</sub> N       | 100       | 70     | <i>S</i>     |
| 22    | 7-P(O) <sub>2</sub> O        | 13-P(O) <sub>2</sub> N       | 92        | 65     | <i>R</i>     |
| 23    | 7-P(O) <sub>2</sub> O        | 14-P(O) <sub>2</sub> N       | 100       | 70     | <i>R</i>     |
| 24    | 7-P(O) <sub>2</sub> O        | 15-P(O) <sub>2</sub> N       | 100       | 58     | <i>R</i>     |
| 25    | 7-P(O) <sub>2</sub> O        | 16-P(O) <sub>2</sub> N       | 100       | 54     | <i>R</i>     |
| 26    | 7-P(O) <sub>2</sub> O        | 17-P(O) <sub>2</sub> N       | 100       | 58     | <i>R</i>     |
| 27    | 7-P(O) <sub>2</sub> O        | 18-P(O) <sub>2</sub> N       | 100       | 64     | <i>R</i>     |
| 28    | 8-P(O) <sub>2</sub> O        | 11-P(O) <sub>2</sub> N       | 100       | 91     | <i>R</i>     |
| 29    | 8-P(O) <sub>2</sub> O        | 12-P(O) <sub>2</sub> N       | 100       | 87     | <i>S</i>     |
| 30    | 8-P(O) <sub>2</sub> O        | 13-P(O) <sub>2</sub> N       | 40        | 28     | <i>R</i>     |
| 31    | 8-P(O) <sub>2</sub> O        | 14-P(O) <sub>2</sub> N       | 30        | 8      | <i>R</i>     |
| 32    | 8-P(O) <sub>2</sub> O        | 15-P(O) <sub>2</sub> N       | 70        | 14     | <i>R</i>     |
| 33    | 8-P(O) <sub>2</sub> O        | 16-P(O) <sub>2</sub> N       | 70        | 20     | <i>R</i>     |
| 34    | 9-P(O) <sub>2</sub> O        | 11-P(O) <sub>2</sub> N       | 100       | 81     | <i>R</i>     |
| 35    | 9-P(O) <sub>2</sub> O        | 12-P(O) <sub>2</sub> N       | 100       | 73     | <i>S</i>     |

Supplementary Material (ESI) for Chemical Communications  
This journal is © The Royal Society of Chemistry 2005

|    |                             |                             |     |     |          |
|----|-----------------------------|-----------------------------|-----|-----|----------|
| 36 | <b>10-P(O)<sub>2</sub>O</b> | <b>11-P(O)<sub>2</sub>N</b> | 90  | rac | -        |
| 37 | <b>10-P(O)<sub>2</sub>O</b> | <b>12-P(O)<sub>2</sub>N</b> | 100 | rac | -        |
| 38 | <b>20-P(O)<sub>2</sub>O</b> | <b>11-P(O)<sub>2</sub>N</b> | 100 | 80  | <i>R</i> |
| 39 | <b>20-P(O)<sub>2</sub>O</b> | <b>12-P(O)<sub>2</sub>N</b> | 100 | 74  | <i>S</i> |
| 40 | <b>20-P(O)<sub>2</sub>O</b> | <b>13-P(O)<sub>2</sub>N</b> | 30  | 61  | <i>S</i> |
| 41 | <b>20-P(O)<sub>2</sub>O</b> | <b>14-P(O)<sub>2</sub>N</b> | 40  | 32  | <i>S</i> |
| 42 | <b>20-P(O)<sub>2</sub>O</b> | <b>15-P(O)<sub>2</sub>N</b> | 0   | -   | -        |
| 43 | <b>20-P(O)<sub>2</sub>O</b> | <b>16-P(O)<sub>2</sub>N</b> | 100 | 4   | <i>S</i> |
| 44 | <b>20-P(O)<sub>2</sub>O</b> | <b>17-P(O)<sub>2</sub>N</b> | 100 | 25  | <i>S</i> |
| 45 | <b>20-P(O)<sub>2</sub>O</b> | <b>18-P(O)<sub>2</sub>N</b> | 100 | 30  | <i>S</i> |
| 46 | <b>21-P(O)<sub>2</sub>O</b> | <b>11-P(O)<sub>2</sub>N</b> | 95  | 83  | <i>R</i> |
| 47 | <b>21-P(O)<sub>2</sub>O</b> | <b>12-P(O)<sub>2</sub>N</b> | 95  | 69  | <i>S</i> |
| 48 | <b>21-P(O)<sub>2</sub>O</b> | <b>13-P(O)<sub>2</sub>N</b> | 60  | 23  | <i>R</i> |
| 49 | <b>21-P(O)<sub>2</sub>O</b> | <b>14-P(O)<sub>2</sub>N</b> | 55  | 20  | <i>R</i> |
| 50 | <b>21-P(O)<sub>2</sub>O</b> | <b>15-P(O)<sub>2</sub>N</b> | 20  | 9   | <i>R</i> |
| 51 | <b>21-P(O)<sub>2</sub>O</b> | <b>16-P(O)<sub>2</sub>N</b> | 25  | 9   | <i>R</i> |
| 52 | <b>21-P(O)<sub>2</sub>O</b> | <b>17-P(O)<sub>2</sub>N</b> | 90  | 17  | <i>R</i> |
| 53 | <b>21-P(O)<sub>2</sub>O</b> | <b>18-P(O)<sub>2</sub>N</b> | 80  | 27  | <i>R</i> |
| 54 | <b>22-P(O)<sub>2</sub>O</b> | <b>11-P(O)<sub>2</sub>N</b> | 100 | 74  | <i>R</i> |
| 55 | <b>22-P(O)<sub>2</sub>O</b> | <b>12-P(O)<sub>2</sub>N</b> | 100 | 51  | <i>S</i> |
| 56 | <b>22-P(O)<sub>2</sub>O</b> | <b>13-P(O)<sub>2</sub>N</b> | 90  | 10  | <i>R</i> |
| 57 | <b>22-P(O)<sub>2</sub>O</b> | <b>14-P(O)<sub>2</sub>N</b> | 100 | 15  | <i>R</i> |
| 58 | <b>22-P(O)<sub>2</sub>O</b> | <b>15-P(O)<sub>2</sub>N</b> | 70  | 27  | <i>R</i> |
| 59 | <b>22-P(O)<sub>2</sub>O</b> | <b>16-P(O)<sub>2</sub>N</b> | 100 | 21  | <i>R</i> |
| 60 | <b>24-P(O)<sub>2</sub>O</b> | <b>11-P(O)<sub>2</sub>N</b> | 90  | 4   | <i>R</i> |
| 61 | <b>24-P(O)<sub>2</sub>O</b> | <b>12-P(O)<sub>2</sub>N</b> | 80  | 9   | <i>S</i> |
| 62 | <b>25-P(O)<sub>2</sub>O</b> | <b>11-P(O)<sub>2</sub>N</b> | 90  | 8   | <i>R</i> |
| 63 | <b>25-P(O)<sub>2</sub>O</b> | <b>12-P(O)<sub>2</sub>N</b> | 100 | 22  | <i>R</i> |

---

Rh-catalysed asymmetric 1,4-conjugate addition of phenyl boronic acid to 2-cyclohepten-1-one: Ligand library screening.

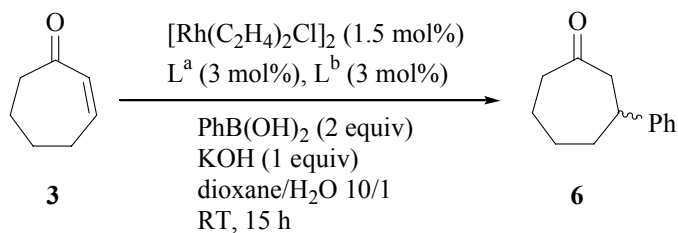

| Entry | Ligand L <sup>a</sup>  | Ligand L <sup>b</sup>  | Yield (%) | ee (%) | Abs. Config. |
|-------|------------------------|------------------------|-----------|--------|--------------|
| 1     | 7-P(O) <sub>2</sub> O  | 7-P(O) <sub>2</sub> O  | 100       | 45     | <i>R</i>     |
| 2     | 8-P(O) <sub>2</sub> O  | 8-P(O) <sub>2</sub> O  | 50        | 21     | <i>R</i>     |
| 3     | 9-P(O) <sub>2</sub> O  | 9-P(O) <sub>2</sub> O  | 90        | rac    | -            |
| 4     | 10-P(O) <sub>2</sub> O | 10-P(O) <sub>2</sub> O | 30        | 6      | <i>S</i>     |
| 5     | 11-P(O) <sub>2</sub> N | 11-P(O) <sub>2</sub> N | 40        | 45     | <i>R</i>     |
| 6     | 12-P(O) <sub>2</sub> N | 12-P(O) <sub>2</sub> N | 40        | 45     | <i>S</i>     |
| 7     | 13-P(O) <sub>2</sub> N | 13-P(O) <sub>2</sub> N | 0         | -      | -            |
| 8     | 14-P(O) <sub>2</sub> N | 14-P(O) <sub>2</sub> N | 0         | -      | -            |
| 9     | 15-P(O) <sub>2</sub> N | 15-P(O) <sub>2</sub> N | 5         | 21     | <i>S</i>     |
| 10    | 16-P(O) <sub>2</sub> N | 16-P(O) <sub>2</sub> N | 5         | 21     | <i>R</i>     |
| 11    | 17-P(O) <sub>2</sub> N | 17-P(O) <sub>2</sub> N | 0         | -      | -            |
| 12    | 18-P(O) <sub>2</sub> N | 18-P(O) <sub>2</sub> N | 0         | -      | -            |
| 13    | 19-P(O) <sub>2</sub> O | 19-P(O) <sub>2</sub> O | 90        | rac    | -            |
| 14    | 20-P(O) <sub>2</sub> O | 20-P(O) <sub>2</sub> O | 100       | 28     | <i>S</i>     |
| 15    | 21-P(O) <sub>2</sub> O | 21-P(O) <sub>2</sub> O | 80        | 11     | <i>R</i>     |
| 16    | 22-P(O) <sub>2</sub> O | 22-P(O) <sub>2</sub> O | 100       | 19     | <i>R</i>     |
| 17    | 23-P(O) <sub>2</sub> O | 23-P(O) <sub>2</sub> O | 0         | -      | -            |
| 18    | 24-P(O) <sub>2</sub> O | 24-P(O) <sub>2</sub> O | 0         | -      | -            |
| 19    | 25-P(O) <sub>2</sub> O | 25-P(O) <sub>2</sub> O | 15        | rac    | -            |
| 20    | 7-P(O) <sub>2</sub> O  | 11-P(O) <sub>2</sub> N | 100       | 90     | <i>R</i>     |
| 21    | 7-P(O) <sub>2</sub> O  | 12-P(O) <sub>2</sub> N | 100       | 35     | <i>S</i>     |
| 22    | 7-P(O) <sub>2</sub> O  | 13-P(O) <sub>2</sub> N | 40        | 38     | <i>R</i>     |
| 23    | 7-P(O) <sub>2</sub> O  | 14-P(O) <sub>2</sub> N | 30        | 41     | <i>R</i>     |
| 24    | 7-P(O) <sub>2</sub> O  | 15-P(O) <sub>2</sub> N | 70        | 18     | <i>R</i>     |
| 25    | 7-P(O) <sub>2</sub> O  | 16-P(O) <sub>2</sub> N | 90        | 19     | <i>R</i>     |
| 26    | 8-P(O) <sub>2</sub> O  | 11-P(O) <sub>2</sub> N | 100       | 90     | <i>R</i>     |
| 27    | 8-P(O) <sub>2</sub> O  | 12-P(O) <sub>2</sub> N | 100       | 80     | <i>S</i>     |
| 28    | 9-P(O) <sub>2</sub> O  | 11-P(O) <sub>2</sub> N | 100       | 80     | <i>R</i>     |
| 29    | 9-P(O) <sub>2</sub> O  | 12-P(O) <sub>2</sub> N | 80        | 83     | <i>S</i>     |
| 30    | 10-P(O) <sub>2</sub> O | 11-P(O) <sub>2</sub> N | 30        | 5      | <i>R</i>     |
| 31    | 10-P(O) <sub>2</sub> O | 12-P(O) <sub>2</sub> N | 20        | 25     | <i>S</i>     |
| 32    | 20-P(O) <sub>2</sub> O | 11-P(O) <sub>2</sub> N | 100       | 64     | <i>R</i>     |
| 33    | 20-P(O) <sub>2</sub> O | 12-P(O) <sub>2</sub> N | 100       | 62     | <i>S</i>     |
| 34    | 21-P(O) <sub>2</sub> O | 11-P(O) <sub>2</sub> N | 100       | 81     | <i>R</i>     |
| 35    | 21-P(O) <sub>2</sub> O | 12-P(O) <sub>2</sub> N | 100       | 75     | <i>S</i>     |

Supplementary Material (ESI) for Chemical Communications  
This journal is © The Royal Society of Chemistry 2005

|    |                                |                                |     |     |          |
|----|--------------------------------|--------------------------------|-----|-----|----------|
| 36 | <b>22</b> -P(O) <sub>2</sub> O | <b>11</b> -P(O) <sub>2</sub> N | 100 | 86  | <i>R</i> |
| 37 | <b>22</b> -P(O) <sub>2</sub> O | <b>12</b> -P(O) <sub>2</sub> N | 100 | 71  | <i>S</i> |
| 38 | <b>24</b> -P(O) <sub>2</sub> O | <b>11</b> -P(O) <sub>2</sub> N | 40  | 30  | <i>R</i> |
| 39 | <b>24</b> -P(O) <sub>2</sub> O | <b>12</b> -P(O) <sub>2</sub> N | 50  | rac | -        |
| 40 | <b>25</b> -P(O) <sub>2</sub> O | <b>11</b> -P(O) <sub>2</sub> N | 10  | 55  | <i>R</i> |
| 41 | <b>25</b> -P(O) <sub>2</sub> O | <b>12</b> -P(O) <sub>2</sub> N | 10  | 29  | <i>S</i> |

---

Rh-catalysed asymmetric 1,4-conjugate addition of phenyl boronic acid to 2-cyclopenten-1-one: Ligand library screening.

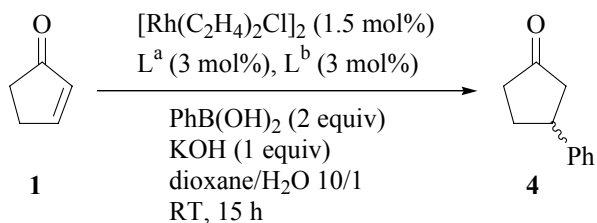

| Entry | Ligand L <sup>a</sup>  | Ligand L <sup>b</sup>  | Yield (%) | ee (%) | Abs. Config. |
|-------|------------------------|------------------------|-----------|--------|--------------|
| 1     | 7-P(O) <sub>2</sub> O  | 7-P(O) <sub>2</sub> O  | 100       | 45     | <i>R</i>     |
| 2     | 8-P(O) <sub>2</sub> O  | 8-P(O) <sub>2</sub> O  | 60        | 16     | <i>R</i>     |
| 3     | 9-P(O) <sub>2</sub> O  | 9-P(O) <sub>2</sub> O  | 100       | 15     | <i>R</i>     |
| 4     | 10-P(O) <sub>2</sub> O | 10-P(O) <sub>2</sub> O | 100       | 58     | <i>S</i>     |
| 5     | 11-P(O) <sub>2</sub> N | 11-P(O) <sub>2</sub> N | 90        | 32     | <i>R</i>     |
| 6     | 12-P(O) <sub>2</sub> N | 12-P(O) <sub>2</sub> N | 90        | 32     | <i>S</i>     |
| 7     | 13-P(O) <sub>2</sub> N | 13-P(O) <sub>2</sub> N | 0         | -      | -            |
| 8     | 14-P(O) <sub>2</sub> N | 14-P(O) <sub>2</sub> N | 0         | -      | -            |
| 9     | 15-P(O) <sub>2</sub> N | 15-P(O) <sub>2</sub> N | 0         | -      | -            |
| 10    | 16-P(O) <sub>2</sub> N | 16-P(O) <sub>2</sub> N | 0         | -      | -            |
| 11    | 17-P(O) <sub>2</sub> N | 17-P(O) <sub>2</sub> N | 0         | -      | -            |
| 12    | 18-P(O) <sub>2</sub> N | 18-P(O) <sub>2</sub> N | 0         | -      | -            |
| 13    | 19-P(O) <sub>2</sub> O | 19-P(O) <sub>2</sub> O | 100       | 15     | <i>S</i>     |
| 14    | 20-P(O) <sub>2</sub> O | 20-P(O) <sub>2</sub> O | 100       | 15     | <i>S</i>     |
| 15    | 21-P(O) <sub>2</sub> O | 21-P(O) <sub>2</sub> O | 100       | 27     | <i>R</i>     |
| 16    | 22-P(O) <sub>2</sub> O | 22-P(O) <sub>2</sub> O | 100       | 8      | <i>R</i>     |
| 17    | 23-P(O) <sub>2</sub> O | 23-P(O) <sub>2</sub> O | 0         | -      | -            |
| 18    | 24-P(O) <sub>2</sub> O | 24-P(O) <sub>2</sub> O | 0         | -      | -            |
| 19    | 25-P(O) <sub>2</sub> O | 25-P(O) <sub>2</sub> O | 0         | -      | -            |
| 20    | 7-P(O) <sub>2</sub> O  | 11-P(O) <sub>2</sub> N | 100       | 73     | <i>R</i>     |
| 21    | 7-P(O) <sub>2</sub> O  | 12-P(O) <sub>2</sub> N | 100       | 13     | <i>R</i>     |
| 22    | 7-P(O) <sub>2</sub> O  | 13-P(O) <sub>2</sub> N | 100       | 26     | <i>R</i>     |
| 23    | 7-P(O) <sub>2</sub> O  | 14-P(O) <sub>2</sub> N | 100       | 35     | <i>R</i>     |
| 24    | 7-P(O) <sub>2</sub> O  | 15-P(O) <sub>2</sub> N | 90        | 40     | <i>R</i>     |
| 25    | 7-P(O) <sub>2</sub> O  | 16-P(O) <sub>2</sub> N | 90        | 40     | <i>R</i>     |
| 26    | 8-P(O) <sub>2</sub> O  | 11-P(O) <sub>2</sub> N | 100       | 68     | <i>R</i>     |
| 27    | 8-P(O) <sub>2</sub> O  | 12-P(O) <sub>2</sub> N | 100       | 26     | <i>S</i>     |
| 28    | 9-P(O) <sub>2</sub> O  | 11-P(O) <sub>2</sub> N | 100       | 55     | <i>R</i>     |
| 29    | 9-P(O) <sub>2</sub> O  | 12-P(O) <sub>2</sub> N | 100       | 13     | <i>S</i>     |
| 30    | 10-P(O) <sub>2</sub> O | 11-P(O) <sub>2</sub> N | 100       | 20     | <i>S</i>     |
| 31    | 10-P(O) <sub>2</sub> O | 12-P(O) <sub>2</sub> N | 100       | 42     | <i>S</i>     |
| 32    | 20-P(O) <sub>2</sub> O | 11-P(O) <sub>2</sub> N | 100       | 51     | <i>R</i>     |
| 33    | 20-P(O) <sub>2</sub> O | 12-P(O) <sub>2</sub> N | 100       | 38     | <i>S</i>     |
| 34    | 21-P(O) <sub>2</sub> O | 11-P(O) <sub>2</sub> N | 100       | 61     | <i>R</i>     |
| 35    | 21-P(O) <sub>2</sub> O | 12-P(O) <sub>2</sub> N | 100       | 36     | <i>S</i>     |

Supplementary Material (ESI) for Chemical Communications  
This journal is © The Royal Society of Chemistry 2005

|    |                             |                             |     |    |          |
|----|-----------------------------|-----------------------------|-----|----|----------|
| 36 | <b>22-P(O)<sub>2</sub>O</b> | <b>11-P(O)<sub>2</sub>N</b> | 100 | 60 | <i>R</i> |
| 37 | <b>22-P(O)<sub>2</sub>O</b> | <b>12-P(O)<sub>2</sub>N</b> | 100 | 47 | <i>S</i> |
| 38 | <b>24-P(O)<sub>2</sub>O</b> | <b>11-P(O)<sub>2</sub>N</b> | 100 | 31 | <i>R</i> |
| 39 | <b>24-P(O)<sub>2</sub>O</b> | <b>12-P(O)<sub>2</sub>N</b> | 100 | 21 | <i>S</i> |
| 40 | <b>25-P(O)<sub>2</sub>O</b> | <b>11-P(O)<sub>2</sub>N</b> | 70  | 50 | <i>R</i> |
| 41 | <b>25-P(O)<sub>2</sub>O</b> | <b>12-P(O)<sub>2</sub>N</b> | 90  | 61 | <i>R</i> |

---



**Figure A:**  $^{31}\text{P}$ -NMR of the complex between  $\text{Rh}(\text{acac})(\text{eth})_2$  (1.0 equiv) and  $7\text{-P}(\text{O})_2\text{O}$  (2.0 equiv) in toluene- $d_8$  at 380 K

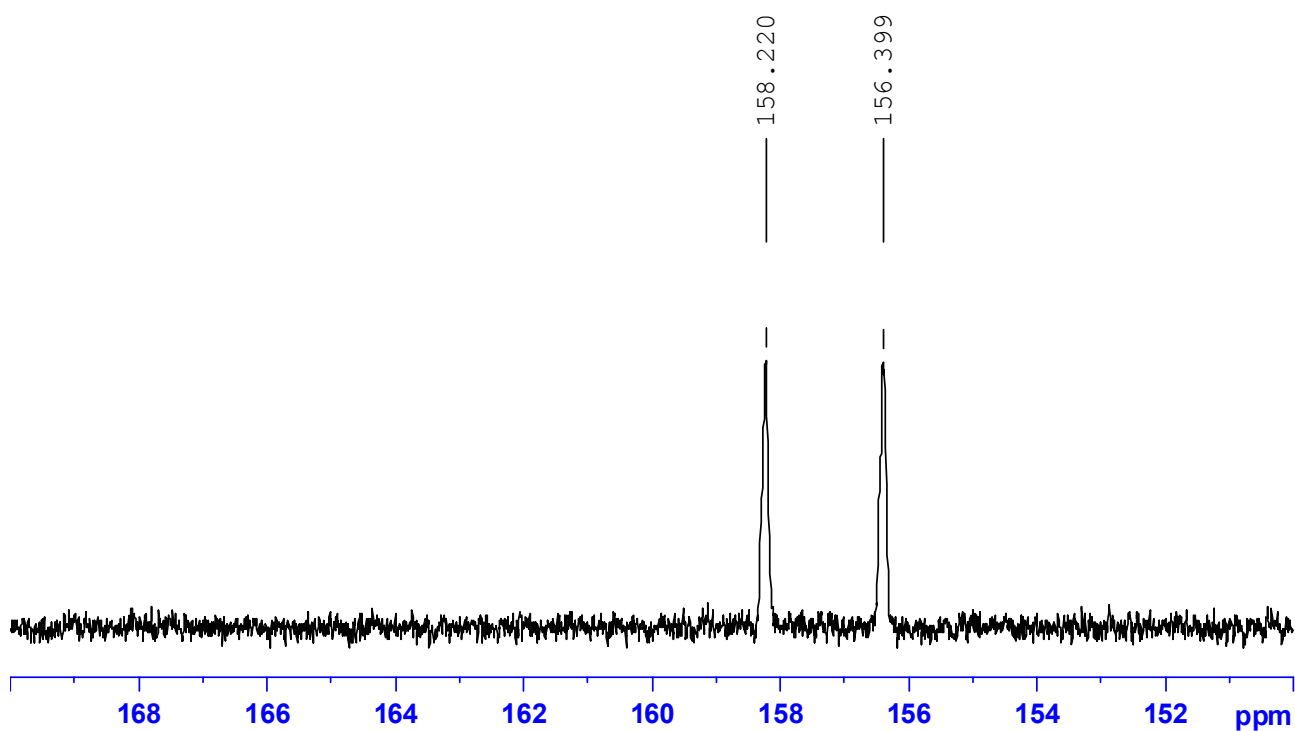

$^{31}\text{P}$ -NMR (162 MHz, Toluene- $d_8$ ):  $\delta = 157.3$  (d,  $J_{\text{P,Rh}} = 295$  Hz) ppm.

**Figure B:**  $^{31}\text{P}$ -NMR of the complex between  $\text{Rh}(\text{acac})(\text{eth})_2$  (1.0 equiv) and  $7\text{-P}(\text{O})_2\text{O}$  (2.0 equiv) in toluene- $d_8$  at 300 K

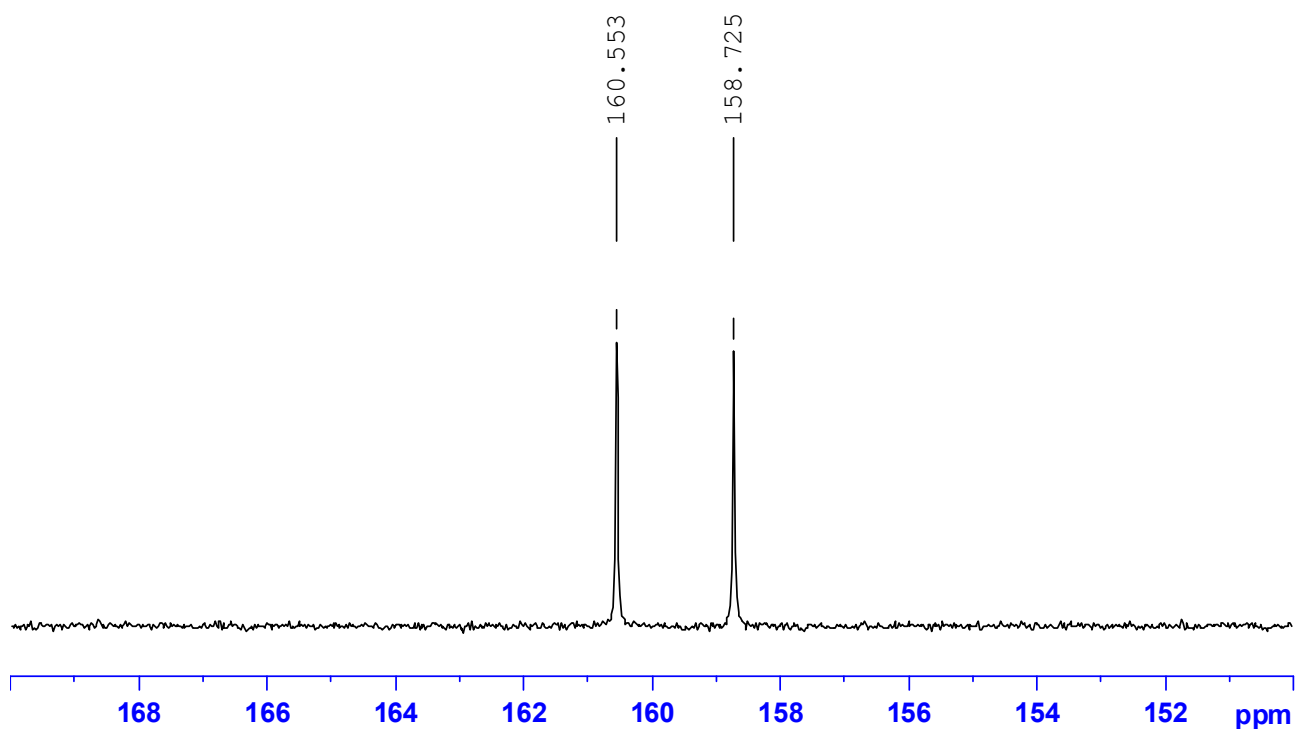

$^{31}\text{P}$ -NMR (162 MHz, Toluene- $d_8$ ):  $\delta = 159.6$  (d,  $J_{\text{P,Rh}} = 296$  Hz) ppm.

**Figure C:**  $^{31}\text{P}$ -NMR of the complex between  $\text{Rh}(\text{acac})(\text{eth})_2$  (1.0 equiv) and  $7\text{-P}(\text{O})_2\text{O}$  (2.0 equiv) in toluene- $d_8$  at 230 K

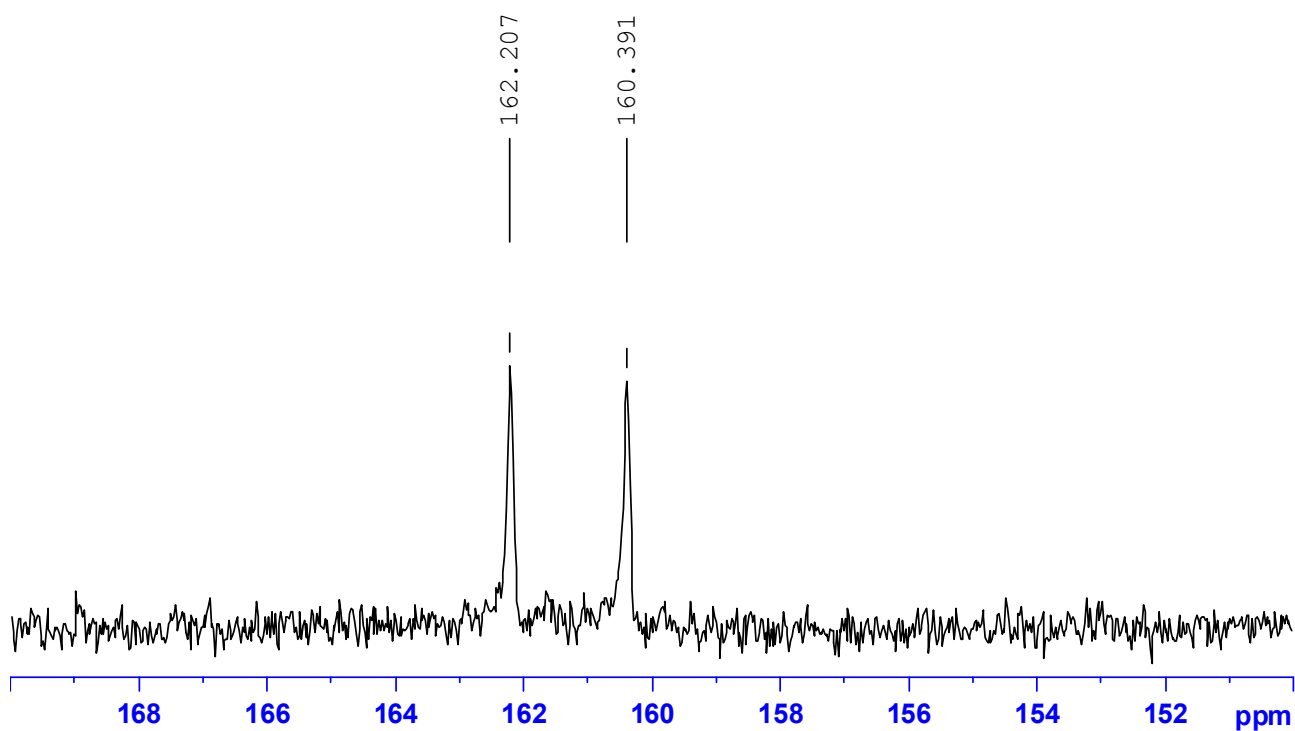

$^{31}\text{P}$ -NMR (162 MHz, Toluene- $d_8$ ):  $\delta = 161.3$  (d,  $J_{\text{P,Rh}} = 294$  Hz) ppm.

**Figure D:**  $^{31}\text{P}$ -NMR of the complex between  $\text{Rh}(\text{acac})(\text{eth})_2$  (1.0 equiv) and **11**- $\text{P}(\text{O})_2\text{N}$  (2.0 equiv) in toluene- $d_8$  at 380 K

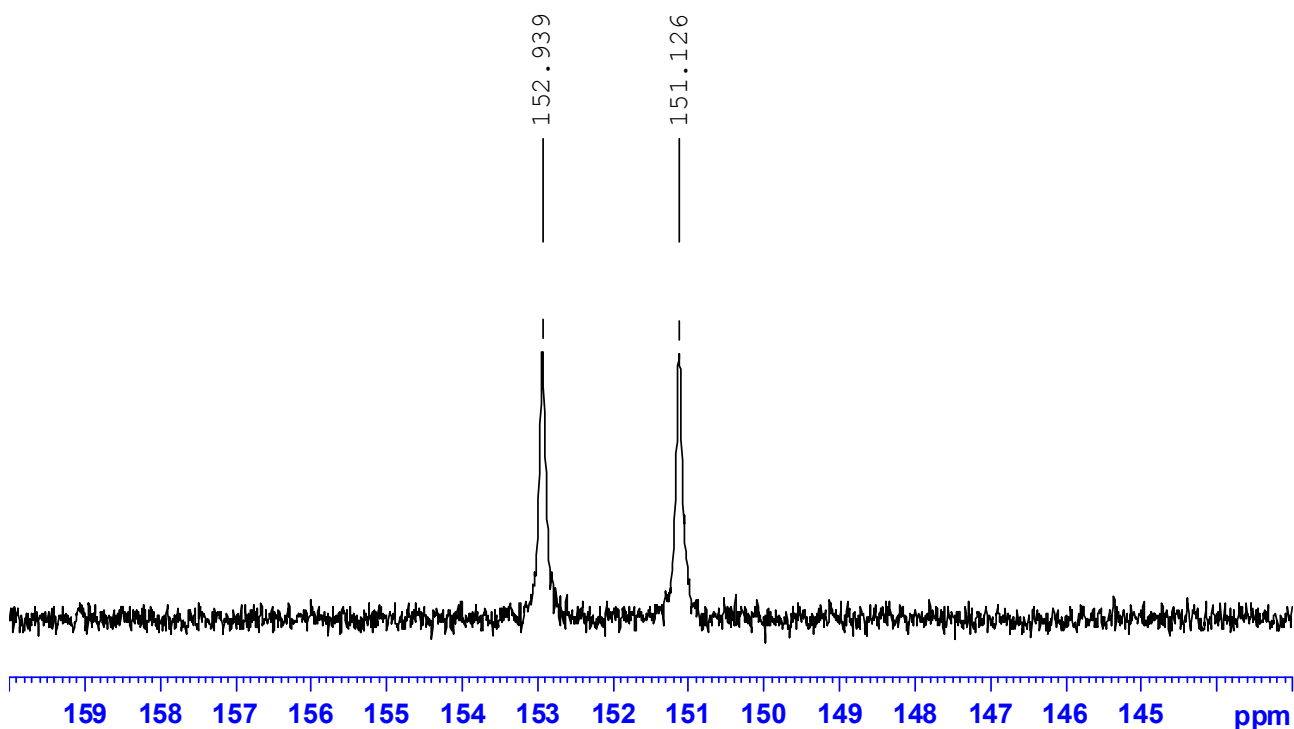

$^{31}\text{P}$ -NMR (162 MHz, Toluene- $d_8$ ):  $\delta = 152.0$  (d,  $J_{\text{P,Rh}} = 294$  Hz) ppm.

**Figure E:**  $^{31}\text{P}$ -NMR of the complex between  $\text{Rh}(\text{acac})(\text{eth})_2$  (1.0 equiv) and **11**- $\text{P}(\text{O})_2\text{N}$  (3.0 equiv) in toluene- $d_8$  at 320 K

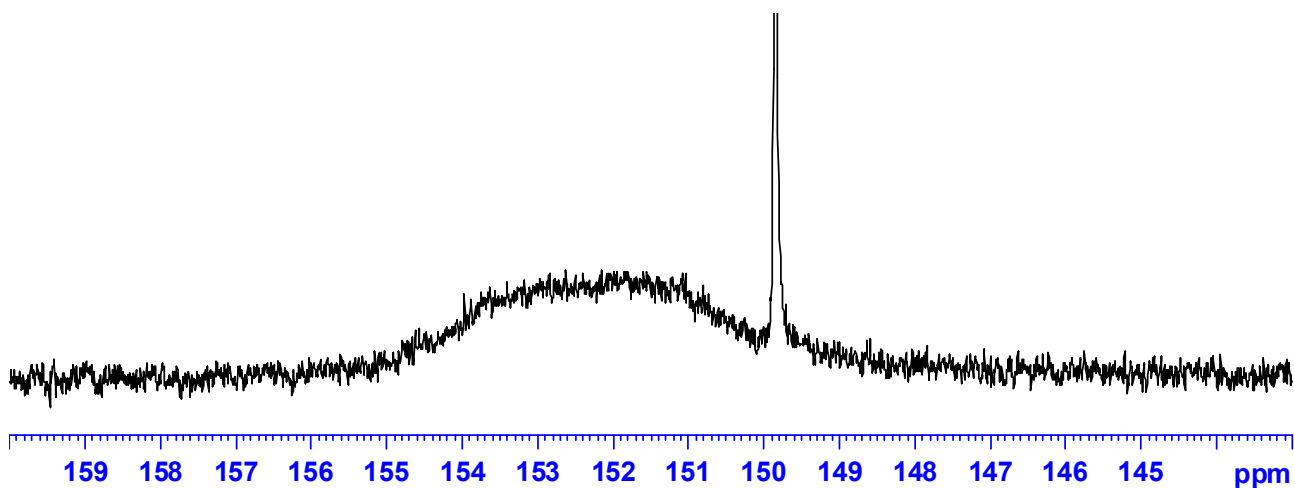

$^{31}\text{P}$ -NMR (162 MHz, Toluene- $d_8$ ):  $\delta = 151.9$  (broad), 149.9 (s, excess ligand) ppm.

**Figure F:**  $^{31}\text{P}$ -NMR of the complex between  $\text{Rh}(\text{acac})(\text{eth})_2$  (1.0 equiv) and **11**- $\text{P}(\text{O})_2\text{N}$  (3.0 equiv) in toluene- $d_8$  at 230 K

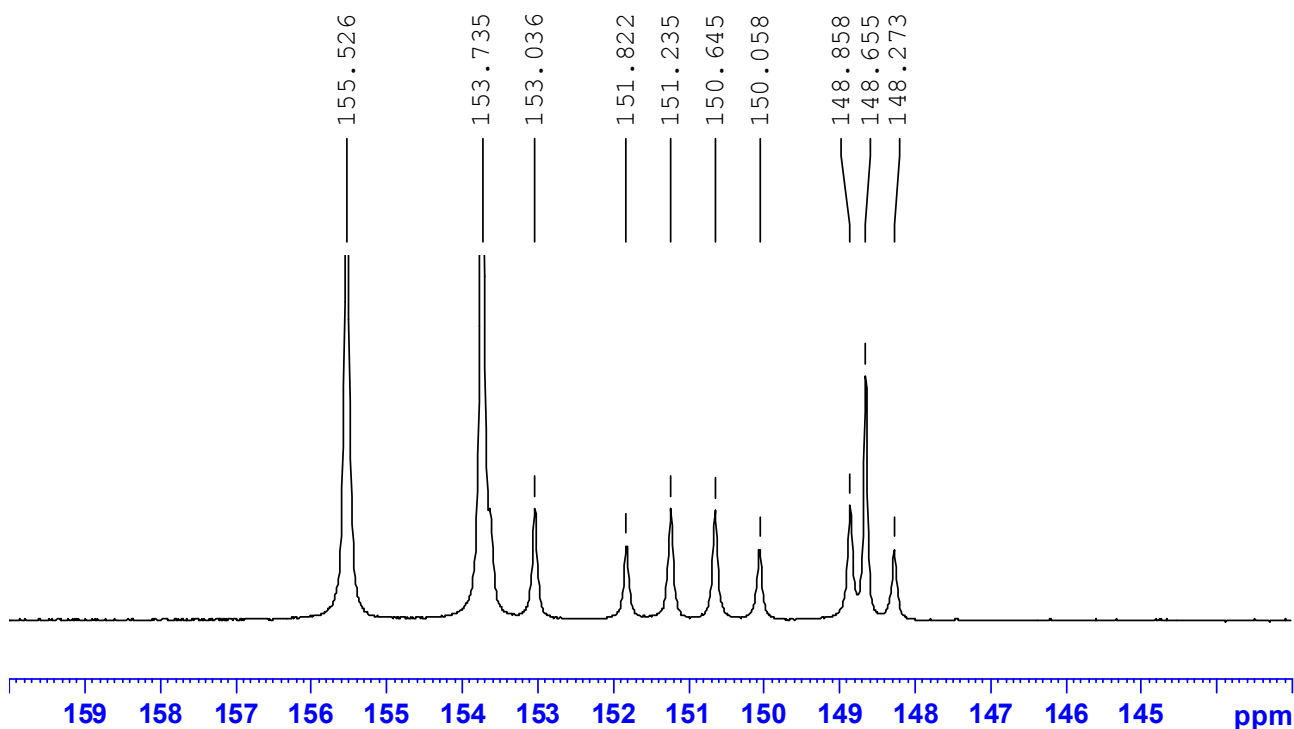

$^{31}\text{P}$ -NMR (162 MHz, Toluene- $d_8$ ):  $\delta = 154.6$  (d,  $J_{\text{P,Rh}} = 290$  Hz),  $152.4$  (dd,  $J_{\text{P,Rh}} = 291.8$  Hz,  $J_{\text{P,P}} = 95$  Hz),  $149.5$  (dd,  $J_{\text{P,Rh}} = 289.5$  Hz,  $J_{\text{P,P}} = 95$  Hz),  $148.7$  (s, excess ligand) ppm.

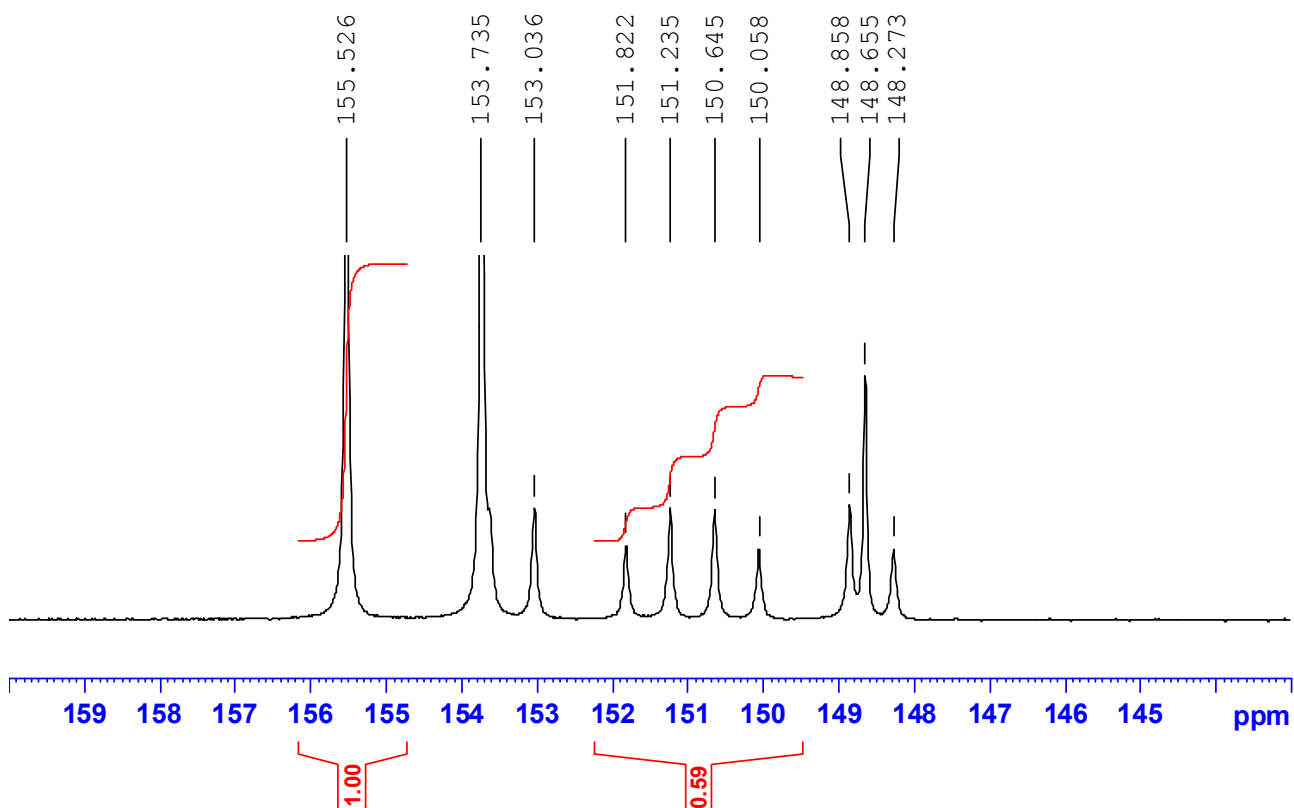

$\{\text{Rh}[(\text{aS})\text{-11}]_2 + \text{Rh}[(\text{aR})\text{-11}]_2\} : \text{Rh}[(\text{aS})\text{-11}][(\text{aR})\text{-11}] = 1 : 0.59$ .

$\text{Rh}[(\text{aS})\text{-11}]_2 + \text{Rh}[(\text{aR})\text{-11}]_2 = 62.9\%$ ;  $\text{Rh}[(\text{aS})\text{-11}][(\text{aR})\text{-11}] = 37.1\%$ .

**Figure G:**  $^{31}\text{P}$ -COSY of the complex between  $\text{Rh}(\text{acac})(\text{eth})_2$  (1.0 equiv) and **11**- $\text{P}(\text{O})_2\text{N}$  (3.0 equiv) in toluene- $d_8$  at 230 K

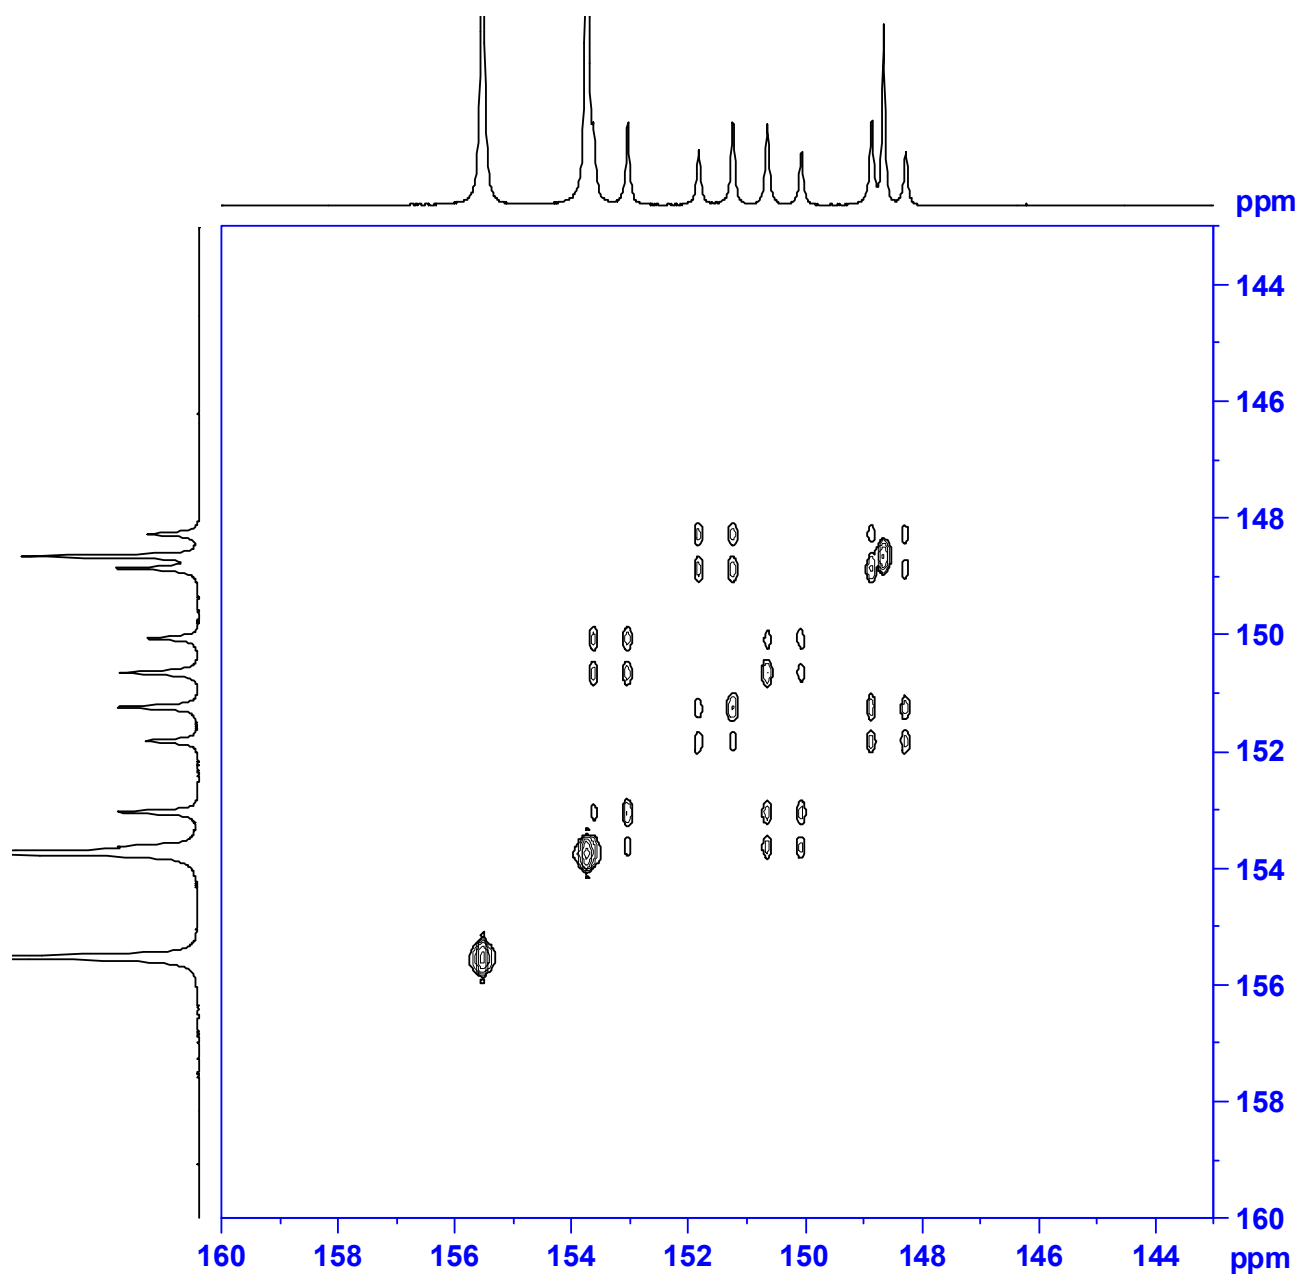

Considering the complex  $\text{Rh}[(aS)\text{-11}][(aR)\text{-11}]$ , a calculation of the free energy of activation for the rotation around the biphenol stereogenic axis  $[(aS)\text{-11}] \rightleftharpoons [(aR)\text{-11}]$  in toluene- $d_8$  was performed. At 230 K, the chemical shifts of the two P atoms of the  $\text{Rh}[(aS)\text{-11}][(aR)\text{-11}]$  complex are = 152.4 ppm (dd,  $J_{\text{P, Rh}} = 291.8$  Hz,  $J_{\text{P, P}} = 95$  Hz) and = 149.5 ppm (dd,  $J_{\text{P, Rh}} = 289.5$  Hz,  $J_{\text{P, P}} = 95$  Hz), respectively; this gives a frequency separation ( $\Delta\nu$ ) of 469.8 Hz. On warming, the lines broaden and coalesce: the coalescence temperature ( $T_c$ ) is 320 K. From these data, the free energy of activation was calculated  $\Delta G^\ddagger = RT_c [23 + \ln(T_c / \Delta\nu)] = 14.38$  kcal / mol.<sup>8</sup>

<sup>8</sup> M. Oki, in *Application of Dynamic NMR Spectroscopy to Organic Chemistry*, VCH: Weinheim, 1985.

**Figure H:**  $^{31}\text{P}$ -NMR of the complex between  $\text{Rh}(\text{acac})(\text{eth})_2$  (1.0 equiv) and **11**- $\text{P}(\text{O})_2\text{N}$  (2.0 equiv) in dichloromethane- $\text{d}_2$  at 310 K

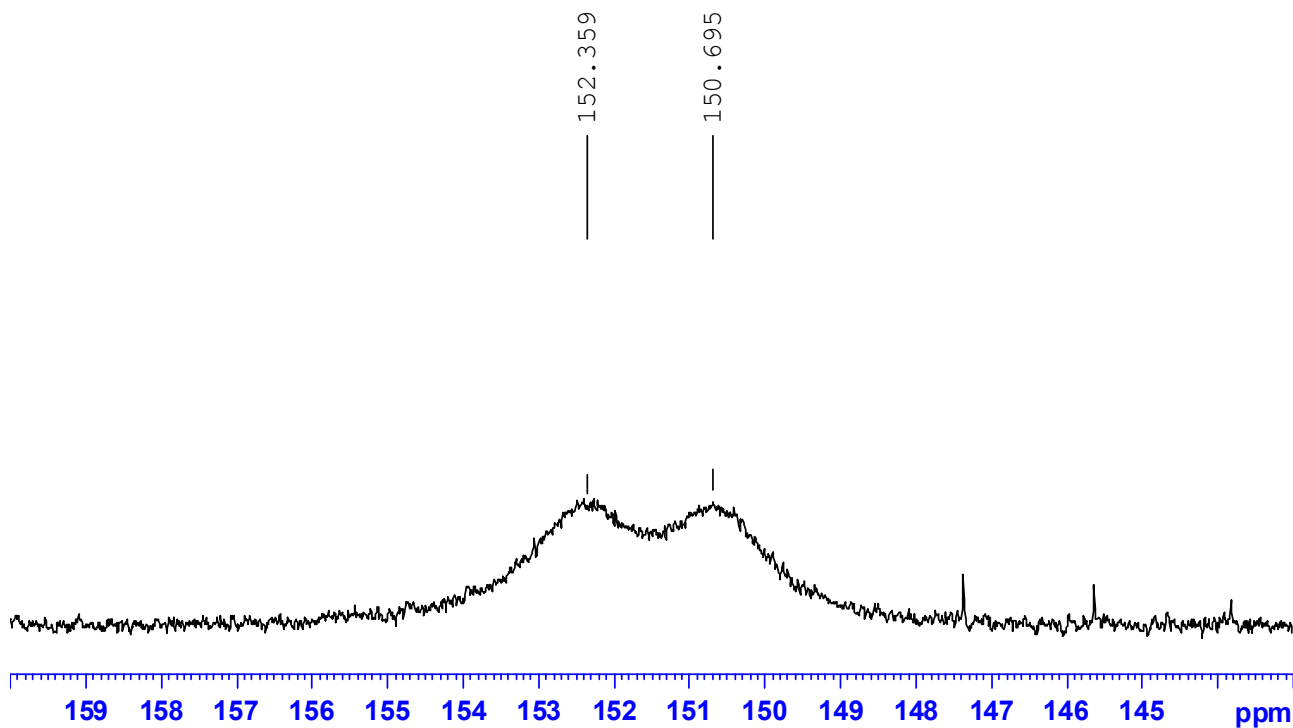

$^{31}\text{P}$ -NMR (162 MHz, Dichloromethane- $\text{d}_2$ ):  $\delta = 151.5$  (d,  $J_{\text{P,Rh}} = 270$  Hz) ppm.

**Figure I:**  $^{31}\text{P}$ -NMR of the complex between  $\text{Rh}(\text{acac})(\text{eth})_2$  (1.0 equiv) and **11**- $\text{P}(\text{O})_2\text{N}$  (2.0 equiv) in dichloromethane- $\text{d}_2$  at 290 K

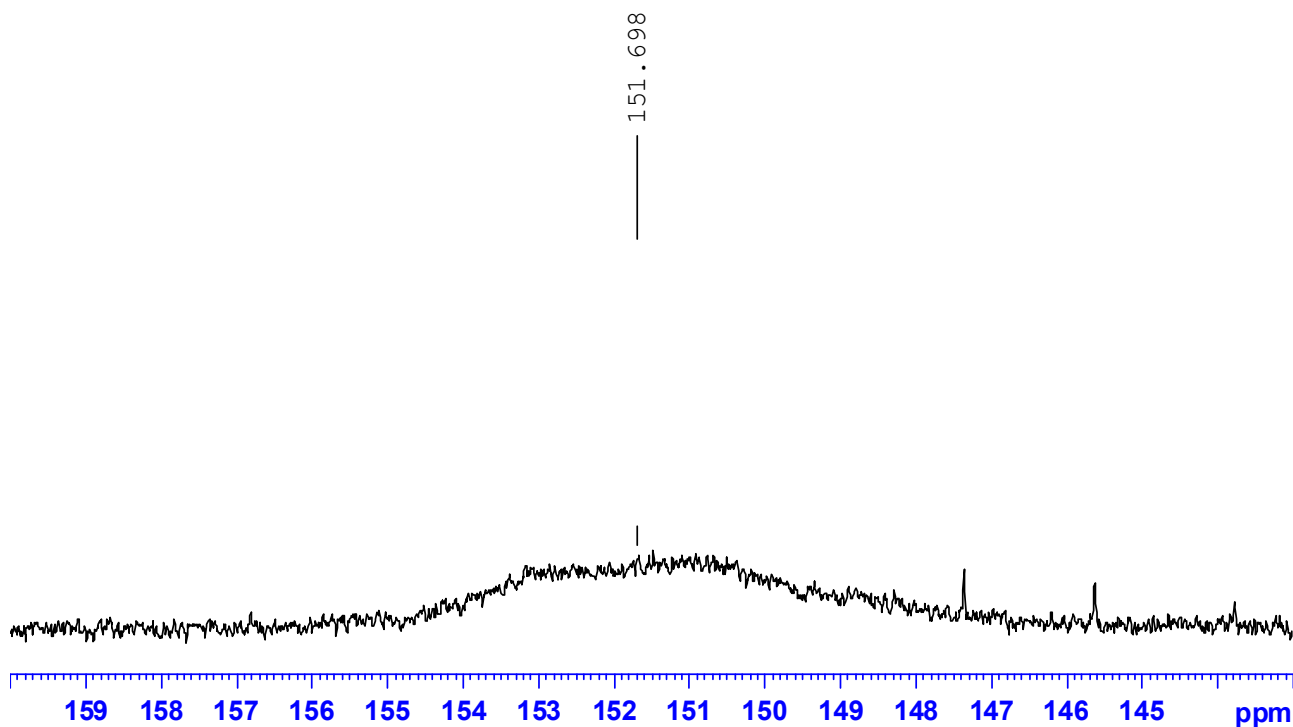

$^{31}\text{P}$ -NMR (162 MHz, Dichloromethane- $\text{d}_2$ ):  $\delta = 151.7$  ppm (broad).

**Figure J:**  $^{31}\text{P}$ -NMR of the complex between  $\text{Rh}(\text{acac})(\text{eth})_2$  (1.0 equiv) and **11**- $\text{P}(\text{O})_2\text{N}$  (2.0 equiv) in dichloromethane- $\text{d}_2$  at 230 K

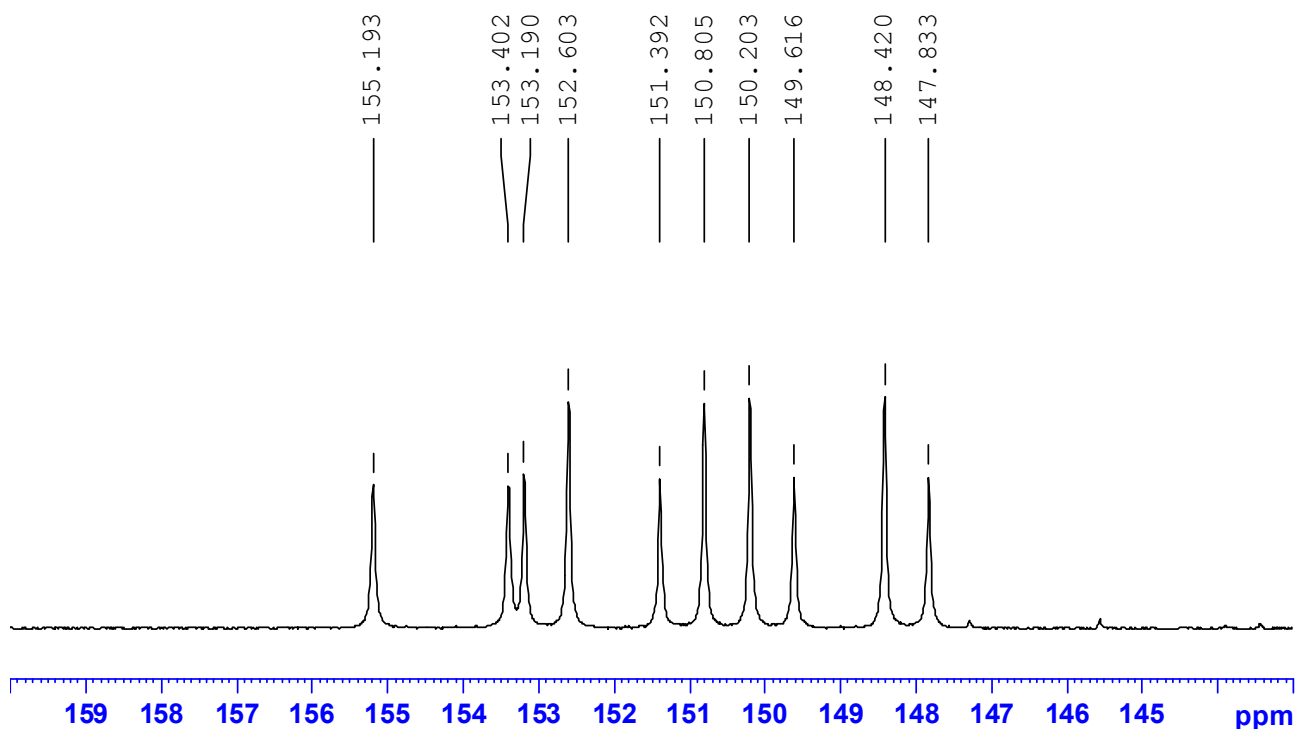

$^{31}\text{P}$ -NMR (162 MHz, Dichloromethane- $\text{d}_2$ ):  $\delta = 154.3$  (d,  $J_{\text{P,Rh}} = 290.1$  Hz),  $152.0$  (dd,  $J_{\text{P,Rh}} = 291.3$  Hz,  $J_{\text{P,P}} = 95$  Hz),  $149.0$  (dd,  $J_{\text{P,Rh}} = 288.8$  Hz,  $J_{\text{P,P}} = 95$  Hz) ppm.

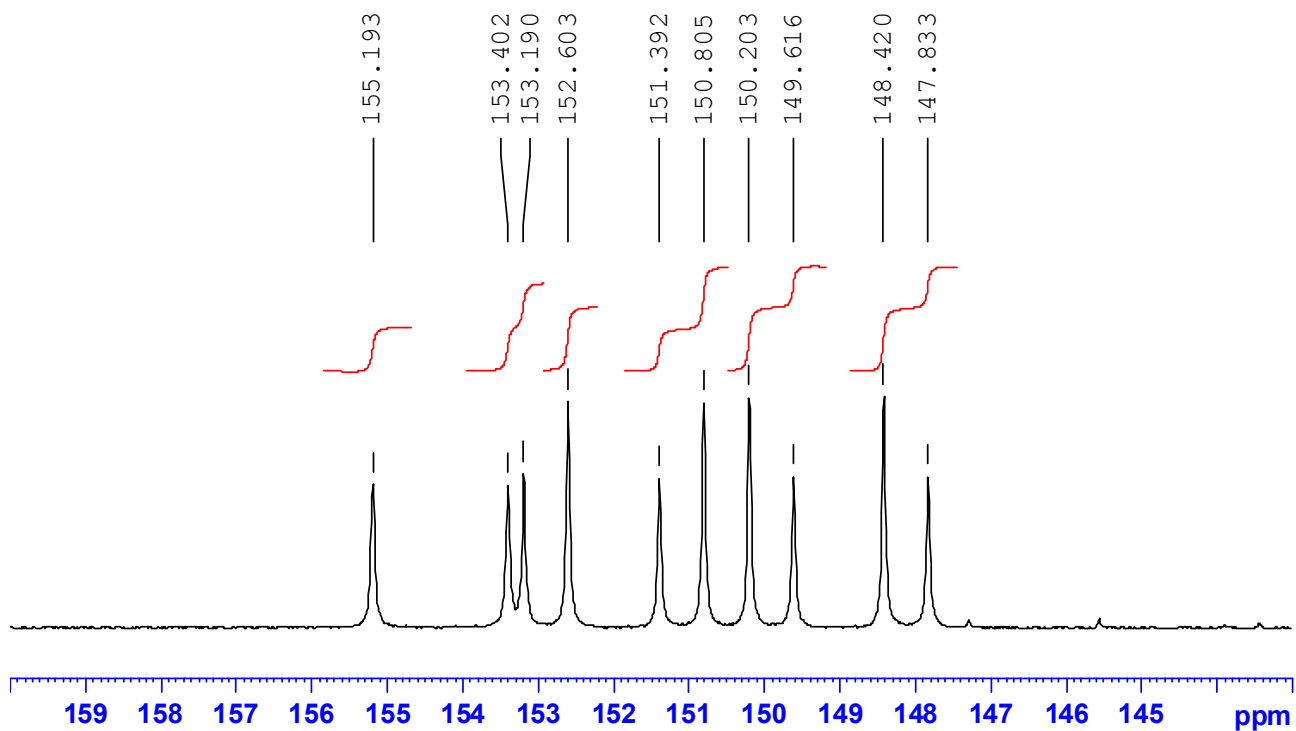

$\{\text{Rh}[(\text{aS})\text{-11}]_2 + \text{Rh}[(\text{aR})\text{-11}]_2\} : \text{Rh}[(\text{aS})\text{-11}][(\text{aR})\text{-11}] = 2 : 9.85$ .

$\text{Rh}[(\text{aS})\text{-11}]_2 + \text{Rh}[(\text{aR})\text{-11}]_2 = 16.9\%$ ;  $\text{Rh}[(\text{aS})\text{-11}][(\text{aR})\text{-11}] = 83.1\%$ .

**Figure K:**  $^{31}\text{P}$ -COSY of the complex between  $\text{Rh}(\text{acac})(\text{eth})_2$  (1.0 equiv) and **11**- $\text{P}(\text{O})_2\text{N}$  (2.0 equiv) in dichloromethane- $d_2$  at 230 K

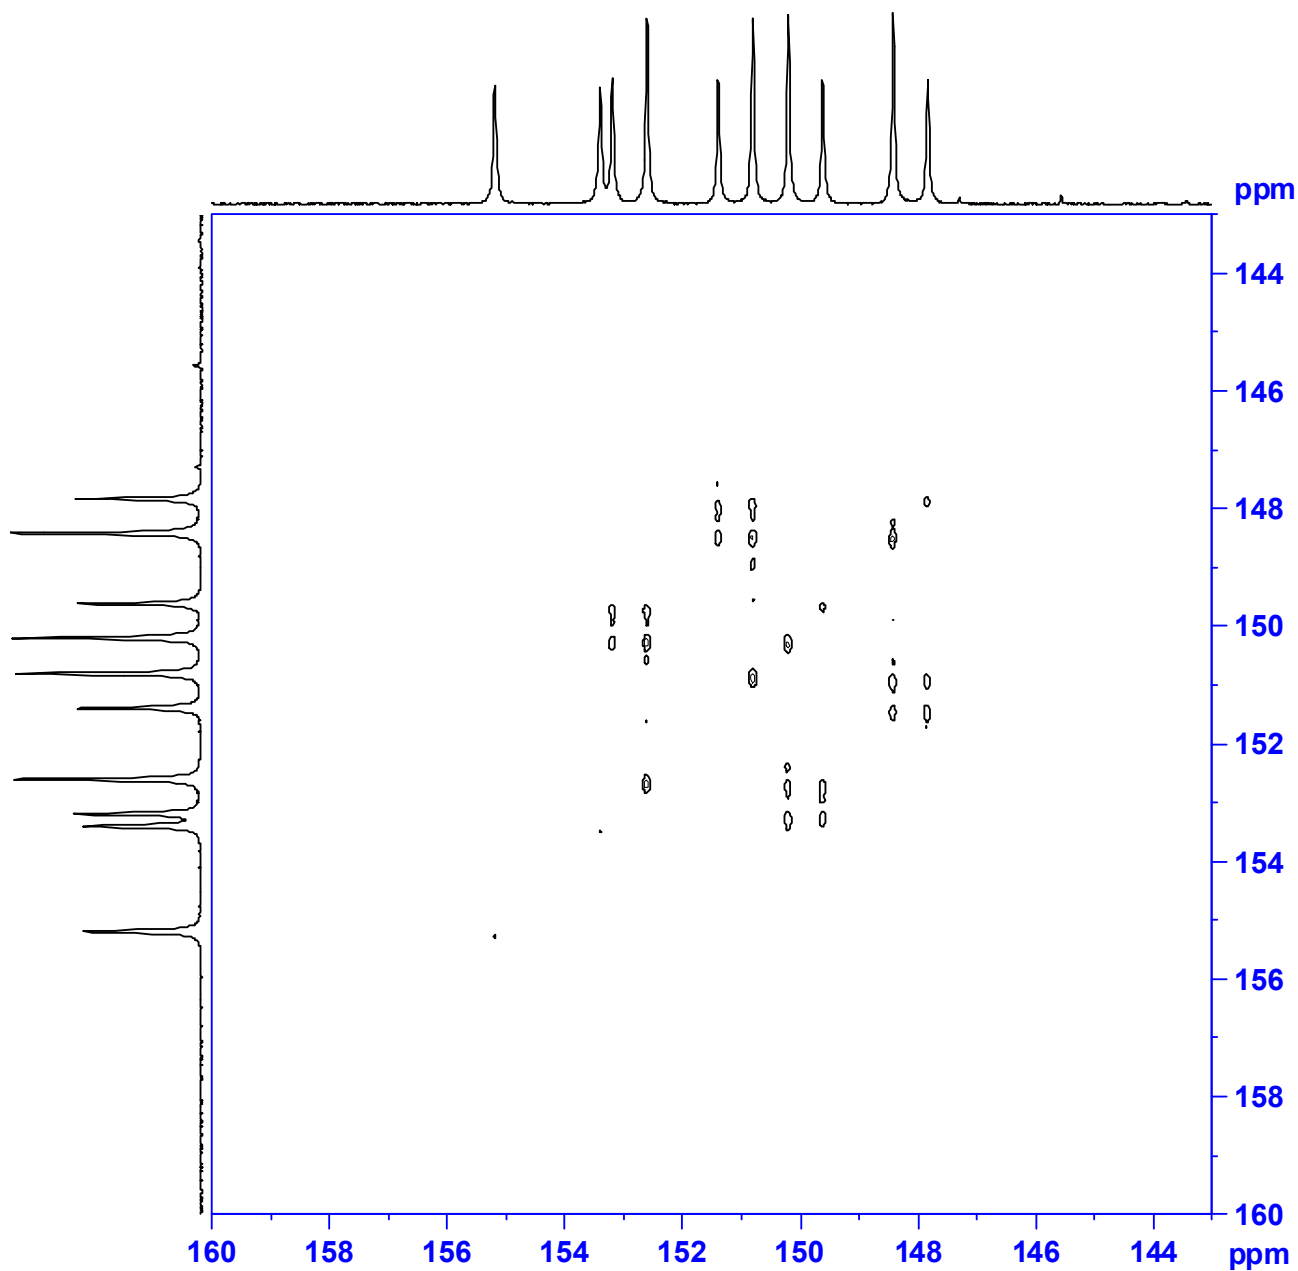

Considering the complex  $\text{Rh}[(aS)\text{-11}][(aR)\text{-11}]$ , a calculation of the free energy of activation for the rotation around the biphenol stereogenic axis  $[(aS)\text{-11}] \rightleftharpoons [(aR)\text{-11}]$  in dichloromethane- $d_2$  was performed. At 230 K, the chemical shifts of the two P atoms of the  $\text{Rh}[(aS)\text{-11}][(aR)\text{-11}]$  complex are = 152.0 ppm (dd,  $J_{\text{P,Rh}} = 291.3$  Hz,  $J_{\text{P,P}} = 95$  Hz) and = 149.0 ppm (dd,  $J_{\text{P,Rh}} = 288.8$  Hz,  $J_{\text{P,P}} = 95$  Hz), respectively; this gives a frequency separation ( $\Delta\nu$ ) of 486.0 Hz. On warming, the lines broaden and coalesce: the coalescence temperature ( $T_c$ ) is 290 K. From these data, the free energy of activation was calculated  $\Delta G^\ddagger = RT_c [23 + \ln(T_c / \Delta\nu)] = 12.95$  kcal / mol.<sup>8</sup>



**Figure L:**  $^{31}\text{P}$ -NMR of the complex between  $\text{Rh}(\text{acac})(\text{eth})_2$  (1.0 equiv),  $7\text{-P}(\text{O})_2\text{O}$  (1.0 equiv) and  $11\text{-P}(\text{O})_2\text{N}$  (1.0 equiv) in toluene- $d_8$  at 375 K

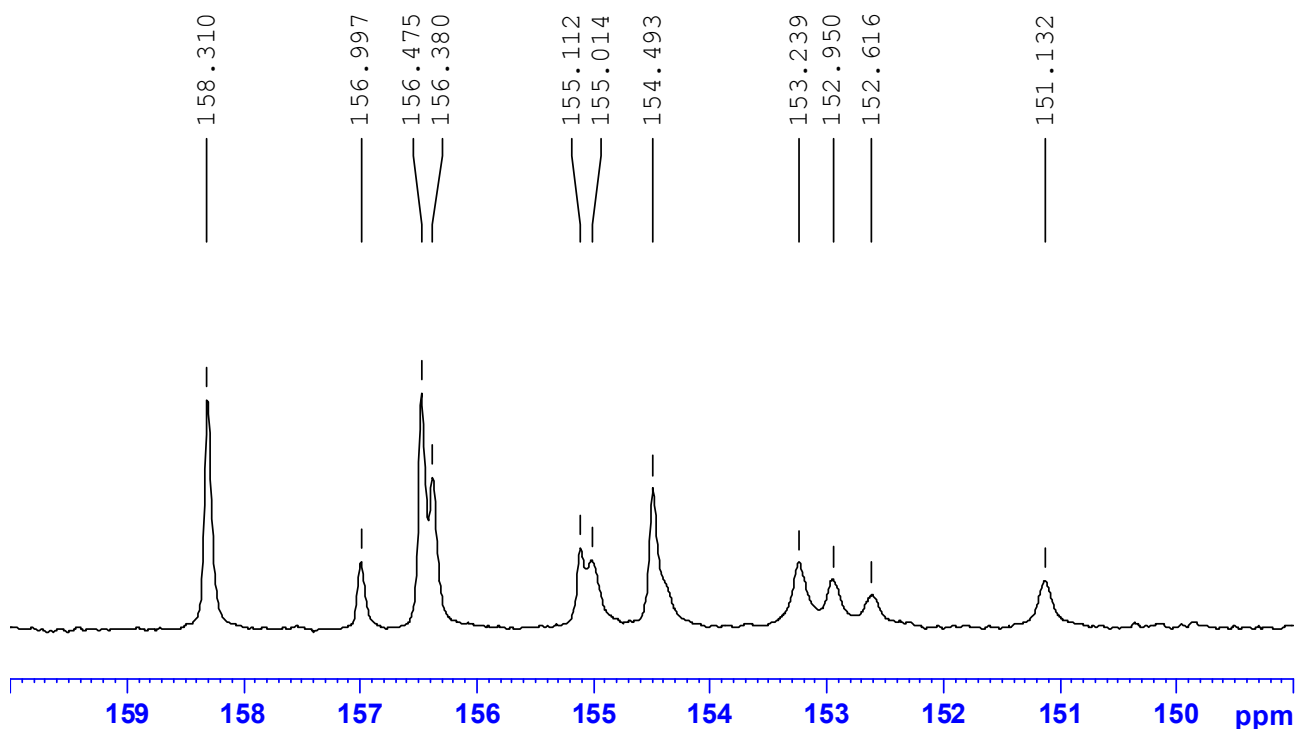

$^{31}\text{P}$ -NMR (162 MHz, Toluene- $d_8$ ):  $\delta = 157.4$  (d,  $J_{\text{P,Rh}} = 297.3$  Hz,  $\text{Rh}[7\text{-P}(\text{O})_2\text{O}]_2$ ),  $155.7$  (dd,  $J_{\text{P,Rh}} = 305.4$  Hz,  $J_{\text{P,P}} = 101$  Hz,  $\text{Rh}[7\text{-P}(\text{O})_2\text{O}][11\text{-P}(\text{O})_2\text{N}]$ ),  $153.8$  (dd,  $J_{\text{P,Rh}} = 287.5$  Hz,  $J_{\text{P,P}} = 101$  Hz,  $\text{Rh}[7\text{-P}(\text{O})_2\text{O}][11\text{-P}(\text{O})_2\text{N}]$ ),  $152.0$  (d,  $J_{\text{P,Rh}} = 294.5$  Hz,  $\text{Rh}[11\text{-P}(\text{O})_2\text{N}]_2$ ) ppm.

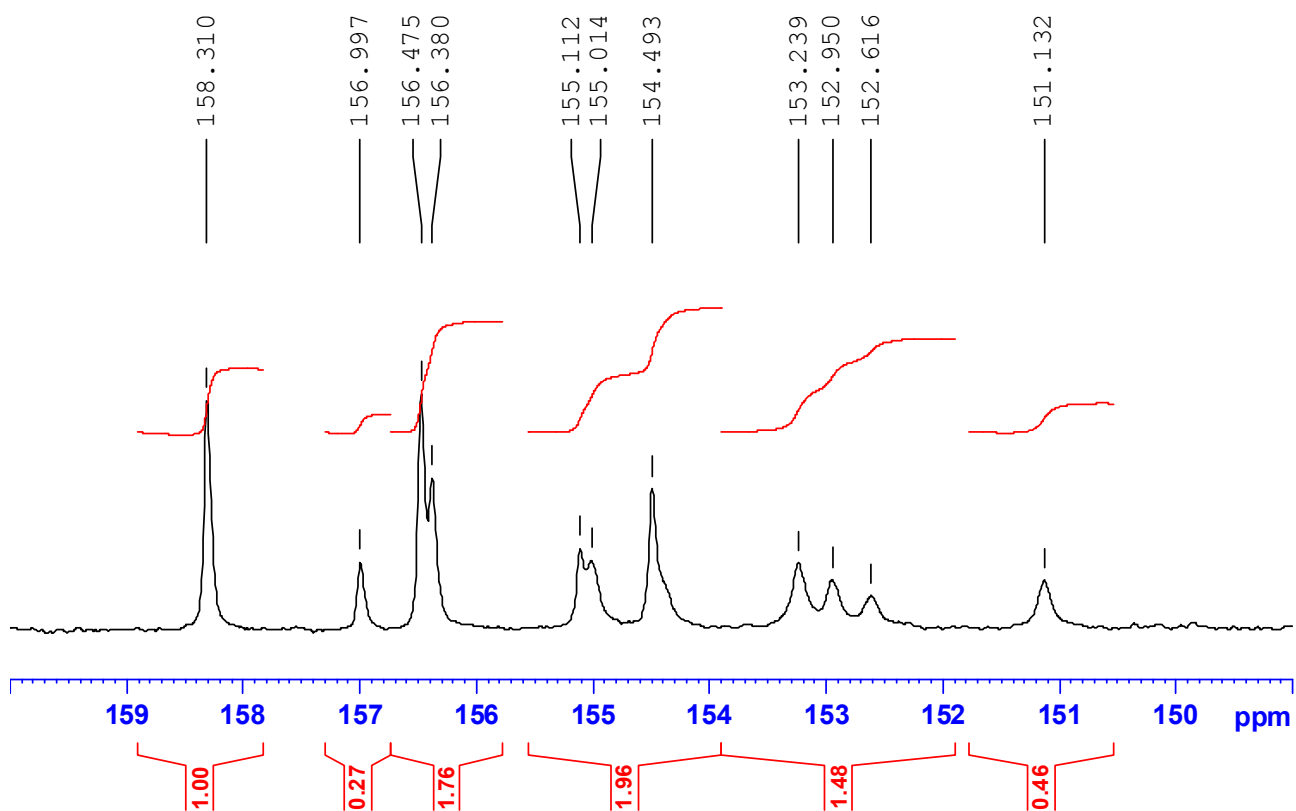

$\text{Rh}[7\text{-P}(\text{O})_2\text{O}]_2 = 28\%$ ;  $\text{Rh}[11\text{-P}(\text{O})_2\text{N}]_2 = 14\%$ ;  $\text{Rh}[7\text{-P}(\text{O})_2\text{O}][11\text{-P}(\text{O})_2\text{N}] = 58\%$ .



**Figure N:**  $^{31}\text{P}$ -NMR of the complex between  $\text{Rh}(\text{acac})(\text{eth})_2$  (1.0 equiv),  $7\text{-P}(\text{O})_2\text{O}$  (1.0 equiv) and  $11\text{-P}(\text{O})_2\text{N}$  (1.0 equiv) in toluene- $d_8$  at 310 K

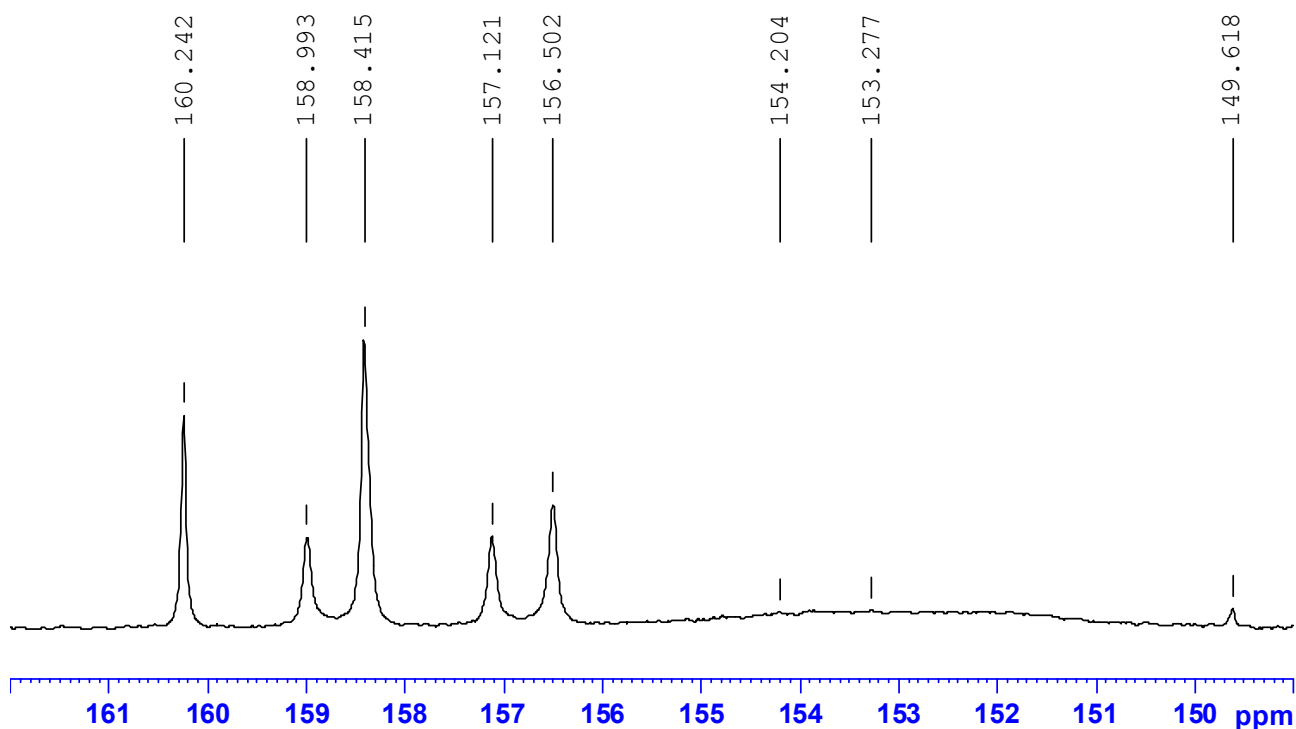

$^{31}\text{P}$ -NMR (162 MHz, Toluene- $d_8$ ):  $\delta = 159.3$  (d,  $J_{\text{P, Rh}} = 296.0$  Hz,  $\text{Rh}[7\text{-P}(\text{O})_2\text{O}]_2$ ),  $157.7$  (dd,  $J_{\text{P, Rh}} = 303.2$  Hz,  $J_{\text{P, P}} = 100.3$  Hz,  $\text{Rh}[7\text{-P}(\text{O})_2\text{O}][11\text{-P}(\text{O})_2\text{N}]$ ),  $155.5\text{-}150.5$  (broad signal,  $\text{Rh}[7\text{-P}(\text{O})_2\text{O}][11\text{-P}(\text{O})_2\text{N}]$  and  $\text{Rh}[11\text{-P}(\text{O})_2\text{N}]_2$ ),  $149.6$  (s, excess ligand) ppm.

**Figure O:**  $^{31}\text{P}$ -NMR of the complex between  $\text{Rh}(\text{acac})(\text{eth})_2$  (1.0 equiv),  $7\text{-P}(\text{O})_2\text{O}$  (1.0 equiv) and  $11\text{-P}(\text{O})_2\text{N}$  (1.0 equiv) in toluene- $d_8$  at 230 K

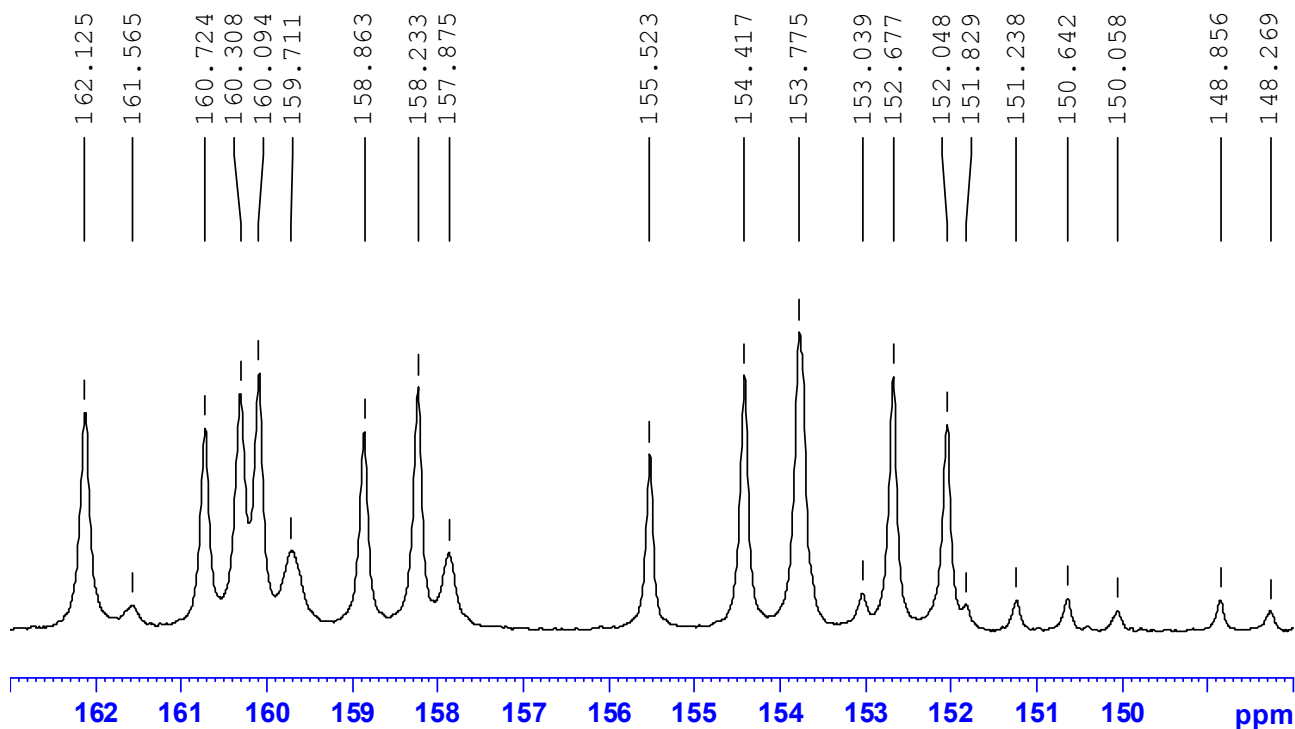

$^{31}\text{P}$ -NMR (162 MHz, Toluene- $d_8$ ):  $\delta$  = 161.2 (d,  $J_{\text{P, Rh}}$  = 294.3 Hz,  $\text{Rh}[7\text{-P}(\text{O})_2\text{O}]_2$ ), 159.5 (dd,  $J_{\text{P, Rh}}$  = 301.5 Hz,  $J_{\text{P, P}}$  = 102.0 Hz,  $\text{Rh}[7\text{-P}(\text{O})_2\text{O}][11\text{-P}(\text{O})_2\text{N}]$ ), 158.8 (d,  $J_{\text{P, Rh}}$  = 297.4 Hz, unknown species), 154.6 (d,  $J_{\text{P, Rh}}$  = 283.2 Hz,  $\text{Rh}[11\text{-P}(\text{O})_2\text{N}]_2$ ), 153.2 (dd,  $J_{\text{P, Rh}}$  = 281.9 Hz,  $J_{\text{P, P}}$  = 101.9 Hz,  $\text{Rh}[7\text{-P}(\text{O})_2\text{O}][11\text{-P}(\text{O})_2\text{N}]$ ), 152.4 (dd,  $J_{\text{P, Rh}}$  = 291.7 Hz,  $J_{\text{P, P}}$  = 95.7 Hz,  $\text{Rh}[11\text{-P}(\text{O})_2\text{N}]_2$ ), 149.4 (dd,  $J_{\text{P, Rh}}$  = 290.0 Hz,  $J_{\text{P, P}}$  = 95.0 Hz,  $\text{Rh}[11\text{-P}(\text{O})_2\text{N}]_2$ ) ppm.

**Figure P:**  $^{31}\text{P}$ -NMR of the complex between  $\text{Rh}(\text{acac})(\text{eth})_2$  (1.0 equiv),  $7\text{-P}(\text{O})_2\text{O}$  (1.0 equiv) and **11**- $\text{P}(\text{O})_2\text{N}$  (1.0 equiv) in toluene- $d_8$  at 230 K

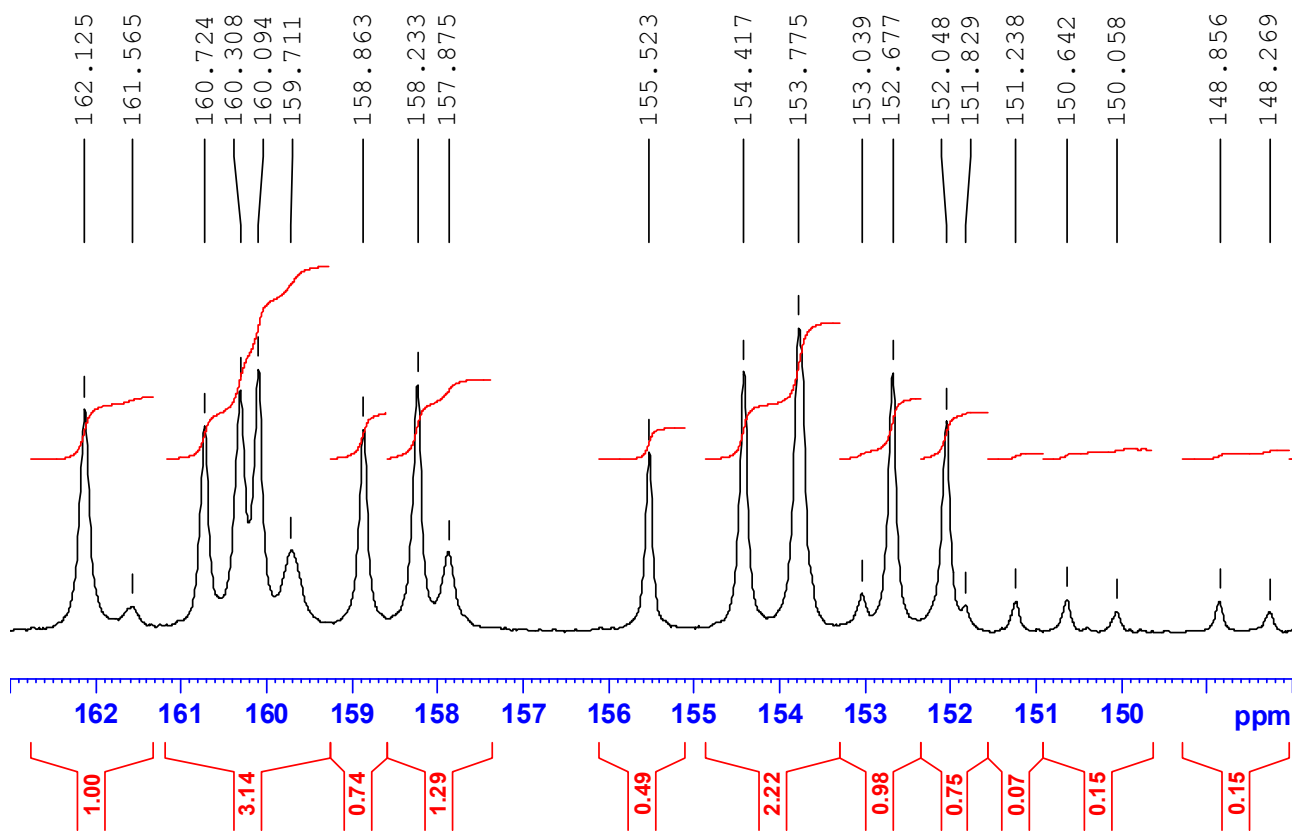

$\text{Rh}[7\text{-P}(\text{O})_2\text{O}]_2 = 20.9\%$ ;  $\text{Rh}[\mathbf{11}\text{-P}(\text{O})_2\text{N}]_2 = 16.4\%$ ;  $\text{Rh}[7\text{-P}(\text{O})_2\text{O}][\mathbf{11}\text{-P}(\text{O})_2\text{N}] = 62.7\%$ .

**Figure Q:**  $^{31}\text{P}$ -COSY of the complex between  $\text{Rh}(\text{acac})(\text{eth})_2$  (1.0 equiv),  $7\text{-P}(\text{O})_2\text{O}$  (1.0 equiv) and **11**- $\text{P}(\text{O})_2\text{N}$  (1.0 equiv) in toluene- $d_8$  at 230 K

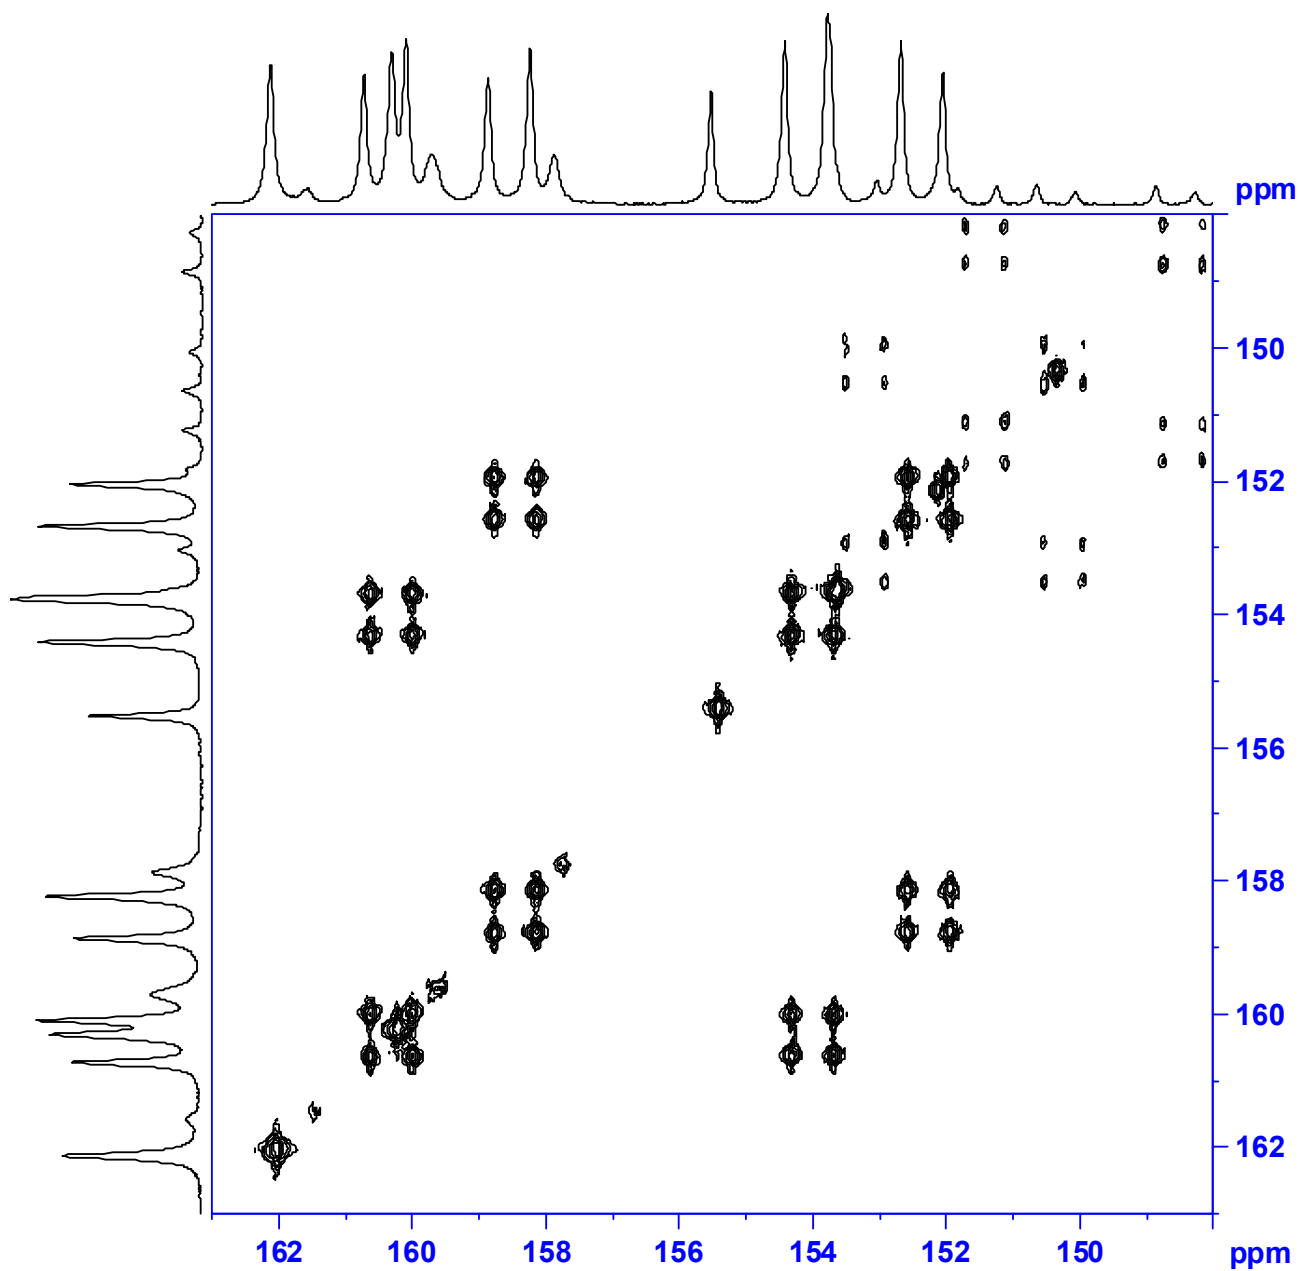

**Figure R:**  $^{31}\text{P}$ -NMR of the complex between  $\text{Rh}(\text{acac})(\text{eth})_2$  (1.0 equiv),  $7\text{-P}(\text{O})_2\text{O}$  (1.0 equiv) and  $12\text{-P}(\text{O})_2\text{N}$  (1.0 equiv) in toluene- $d_8$  at 230 K

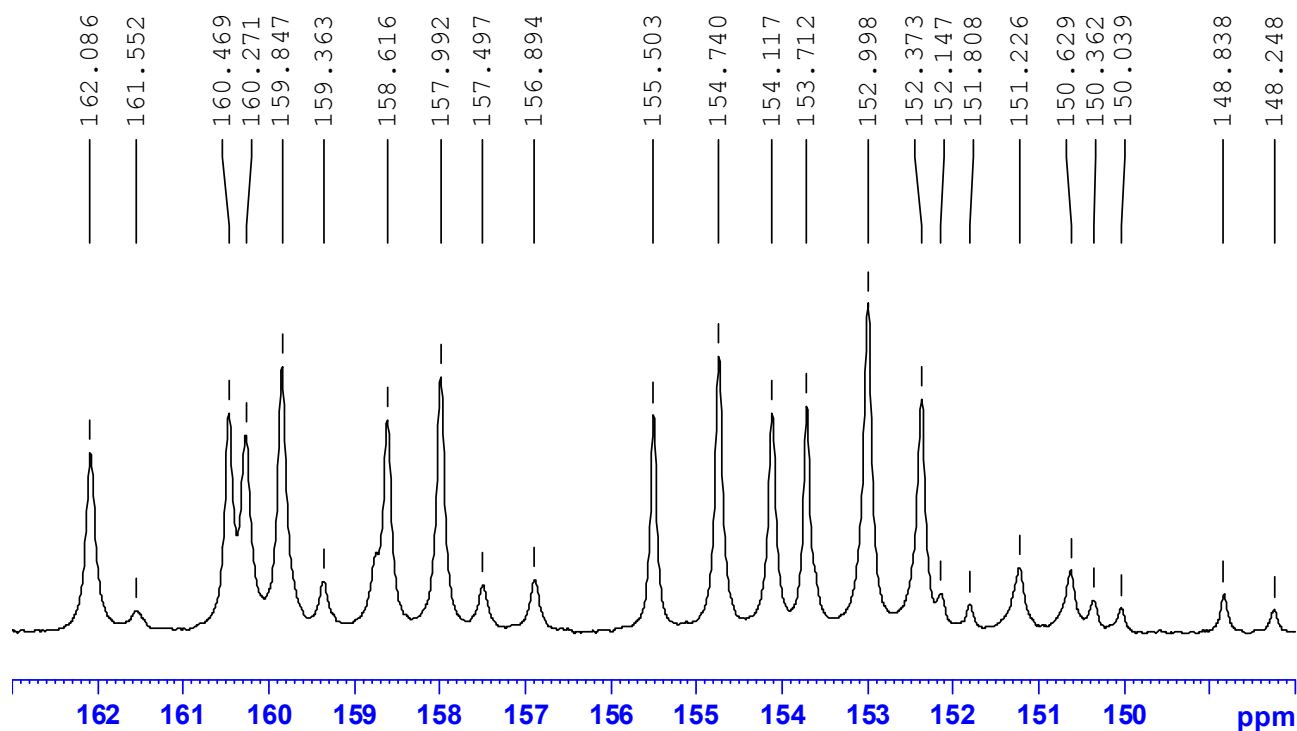

$^{31}\text{P}$ -NMR (162 MHz, Toluene- $d_8$ ):  $\delta$  = 161.2 (d,  $J_{\text{P, Rh}}$  = 294.0 Hz,  $\text{Rh}[7\text{-P}(\text{O})_2\text{O}]_2$ ), 159.2 (dd,  $J_{\text{P, Rh}}$  = 300.5 Hz,  $J_{\text{P, P}}$  = 101 Hz,  $\text{Rh}[7\text{-P}(\text{O})_2\text{O}][12\text{-P}(\text{O})_2\text{N}]$ , major), 158.1 (dd,  $J_{\text{P, Rh}}$  = 302.3 Hz,  $J_{\text{P, P}}$  = 97.7 Hz,  $\text{Rh}[7\text{-P}(\text{O})_2\text{O}][12\text{-P}(\text{O})_2\text{N}]$ , minor), 154.6 (d,  $J_{\text{P, Rh}}$  = 290.1 Hz,  $\text{Rh}[12\text{-P}(\text{O})_2\text{N}]_2$ ), 153.5 (dd,  $J_{\text{P, Rh}}$  = 282.2 Hz,  $J_{\text{P, P}}$  = 101.0 Hz,  $\text{Rh}[7\text{-P}(\text{O})_2\text{O}][12\text{-P}(\text{O})_2\text{N}]$ , major), 152.4 (dd,  $J_{\text{P, Rh}}$  = 290.1 Hz,  $J_{\text{P, P}}$  = 95.6 Hz,  $\text{Rh}[12\text{-P}(\text{O})_2\text{N}]_2$ ), 151.8 (dd,  $J_{\text{P, Rh}}$  = 282.5 Hz,  $J_{\text{P, P}}$  = 97.2 Hz,  $\text{Rh}[7\text{-P}(\text{O})_2\text{O}][12\text{-P}(\text{O})_2\text{N}]$ , minor), 149.3 (dd,  $J_{\text{P, Rh}}$  = 290.1 Hz,  $J_{\text{P, P}}$  = 95.6 Hz,  $\text{Rh}[12\text{-P}(\text{O})_2\text{N}]_2$ ) ppm.

**Figure S:**  $^{31}\text{P}$ -NMR of the complex between  $\text{Rh}(\text{acac})(\text{eth})_2$  (1.0 equiv),  $7\text{-P}(\text{O})_2\text{O}$  (1.0 equiv) and **12**- $\text{P}(\text{O})_2\text{N}$  (1.0 equiv) in toluene- $d_8$  at 230 K

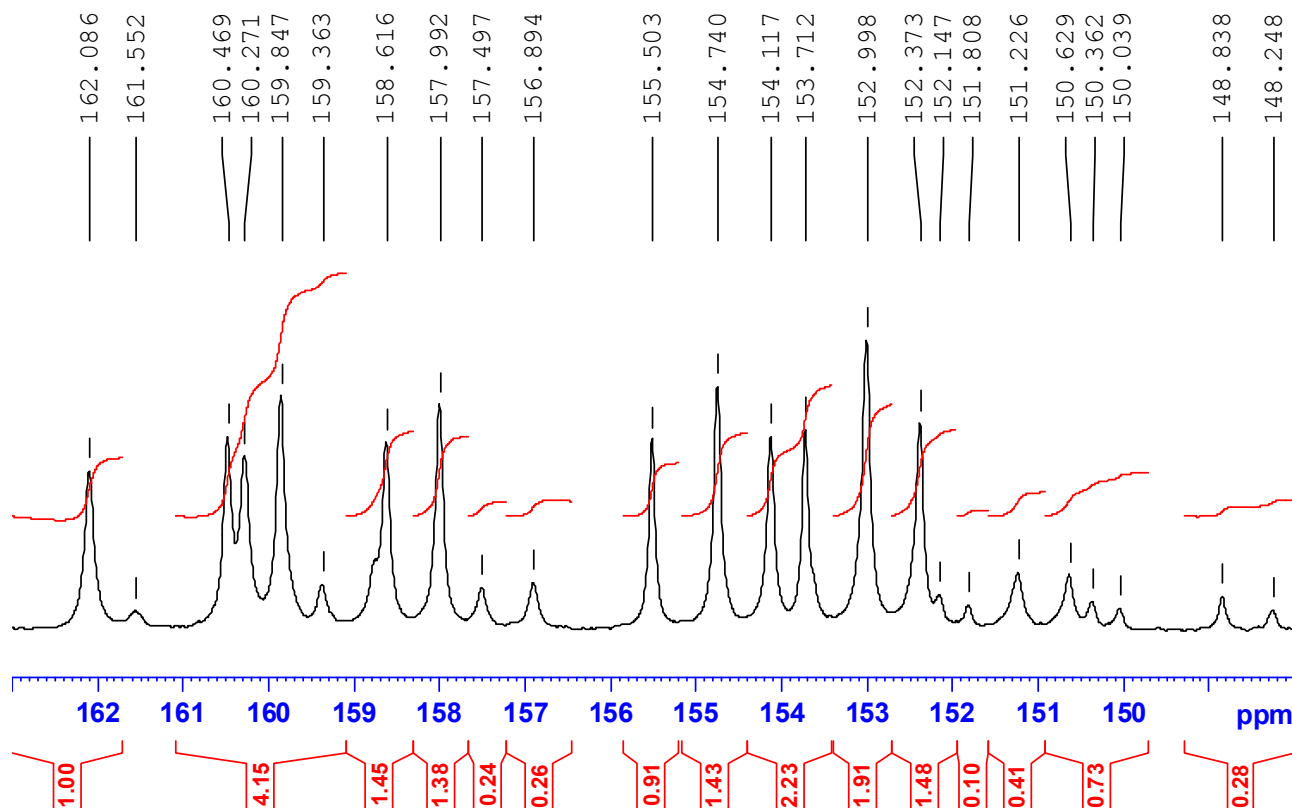

$\{\text{Rh}[(aS)\text{-12}]_2 + \text{Rh}[(aR)\text{-12}]_2 + \text{Rh}[(aS)\text{-12}][(aR)\text{-12}]\} = 16.4\%$ ;

$\text{Rh}[7\text{-P}(\text{O})_2\text{O}]_2 = 11.1\%$ ;

$\{\text{Rh}[(aS)\text{-12}][7\text{-P}(\text{O})_2\text{O}] + \text{Rh}[(aR)\text{-12}][7\text{-P}(\text{O})_2\text{O}]\} = 72.5\%$ ;

$\text{Rh}[(aS)\text{-12}][7\text{-P}(\text{O})_2\text{O}] : \text{Rh}[(aR)\text{-12}][7\text{-P}(\text{O})_2\text{O}] = 85:15$  or  $15:85$ .



**Figure T:**  $^{31}\text{P}$ -COSY of the complex between  $\text{Rh}(\text{acac})(\text{eth})_2$  (1.0 equiv),  $7\text{-P}(\text{O})_2\text{O}$  (1.0 equiv) and  $12\text{-P}(\text{O})_2\text{N}$  (1.0 equiv) in toluene- $d_8$  at 230 K

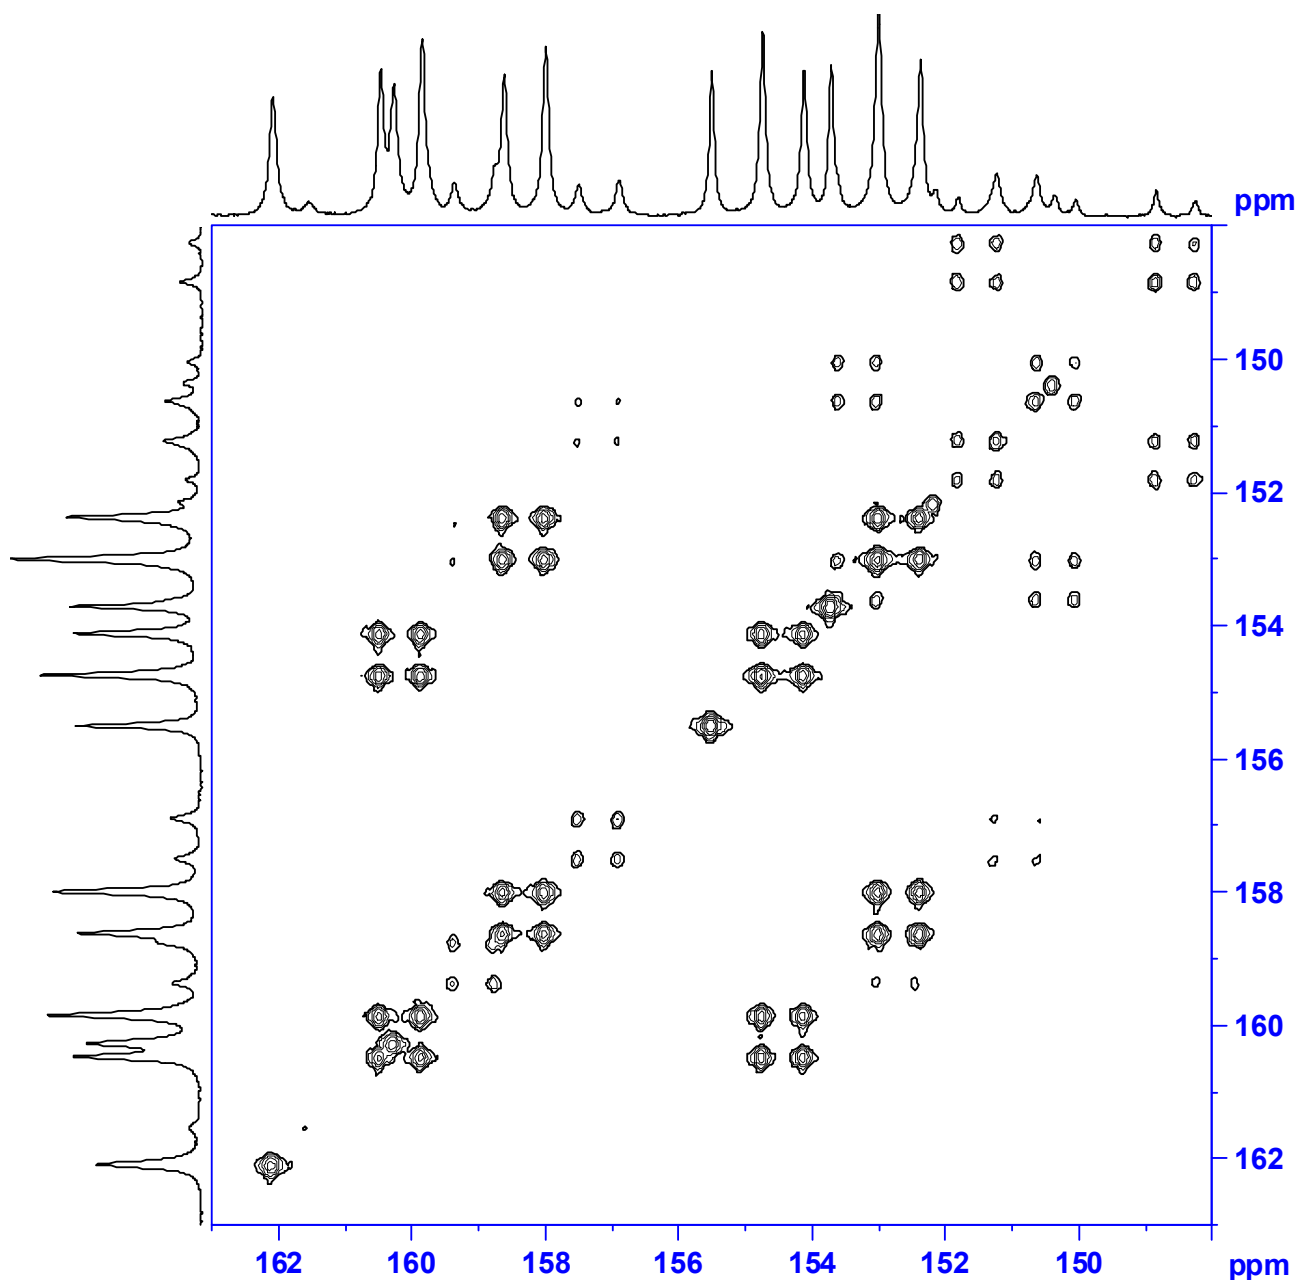

Considering the complexes  $\text{Rh}[(aS)\text{-}12][7\text{-P}(\text{O})_2\text{O}]$  and  $\text{Rh}[(aR)\text{-}12][7\text{-P}(\text{O})_2\text{O}]$ , a calculation of the free energy of activation for the rotation around the biphenol stereogenic axis  $[(aS)\text{-}12] \rightleftharpoons [(aR)\text{-}12]$  in toluene- $d_8$  was performed. At 230 K, the chemical shifts of the two P atoms of the  $\text{Rh}[(aS)\text{-}12][7\text{-P}(\text{O})_2\text{O}]$  and  $\text{Rh}[(aR)\text{-}12][7\text{-P}(\text{O})_2\text{O}]$  complexes are = 159.2 ppm (dd,  $J_{\text{P, Rh}} = 300.5$  Hz,  $J_{\text{P, P}} = 101.0$  Hz,  $\text{Rh}[7\text{-P}(\text{O})_2\text{O}][12\text{-P}(\text{O})_2\text{N}]$ , major) and = 158.1 ppm (dd,  $J_{\text{P, Rh}} = 302.3$  Hz,  $J_{\text{P, P}} = 97.7$  Hz,  $\text{Rh}[7\text{-P}(\text{O})_2\text{O}][12\text{-P}(\text{O})_2\text{N}]$ , minor); this gives a frequency separation ( $\Delta\nu$ ) of 178.2 Hz. On warming, the lines broaden and coalesce: the coalescence temperature ( $T_c$ ) is 310 K. From these data, the free energy of activation was calculated  $\Delta G^\ddagger = RT_c [23 + \ln(T_c / \Delta\nu)] = 14.51$  kcal / mol.<sup>8</sup>

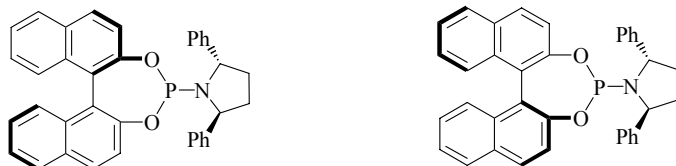

(*R*)-Binaphthol / (*S,S*)-2,5-diphenylpyrrolidine 26-P(O)<sub>2</sub>N    (*S*)-Binaphthol / (*S,S*)-2,5-diphenylpyrrolidine 27-P(O)<sub>2</sub>N

26-P(O)-N, (*R*)-binaphthol / (*S,S*)-2,5-diphenylpyrrolidine:<sup>9</sup> 70% yield. <sup>31</sup>P-NMR (162 MHz, Toluene-d<sub>8</sub>): δ = 153.7 ppm.

27-P(O)-N, (*S*)-binaphthol / (*S,S*)-2,5-diphenylpyrrolidine:<sup>9</sup> 60% yield. <sup>31</sup>P-NMR (162 MHz, Toluene-d<sub>8</sub>): δ = 146.5 ppm.

<sup>9</sup> Y. H. Choi, J. Y. Choi, H. Y. Yang and Y. H. Kim, *Tetrahedron: Asymmetry* 2002, **13**, 801-804.

**Figure U:**  $^{31}\text{P}$ -NMR of the complex between  $\text{Rh}(\text{acac})(\text{eth})_2$  (1.0 equiv) and **27**-P(O)-N [(*S*)-binaphthol / (*S,S*)-2,5-diphenylpyrrolidine] (2.0 equiv) in toluene- $d_8$  at 300 K

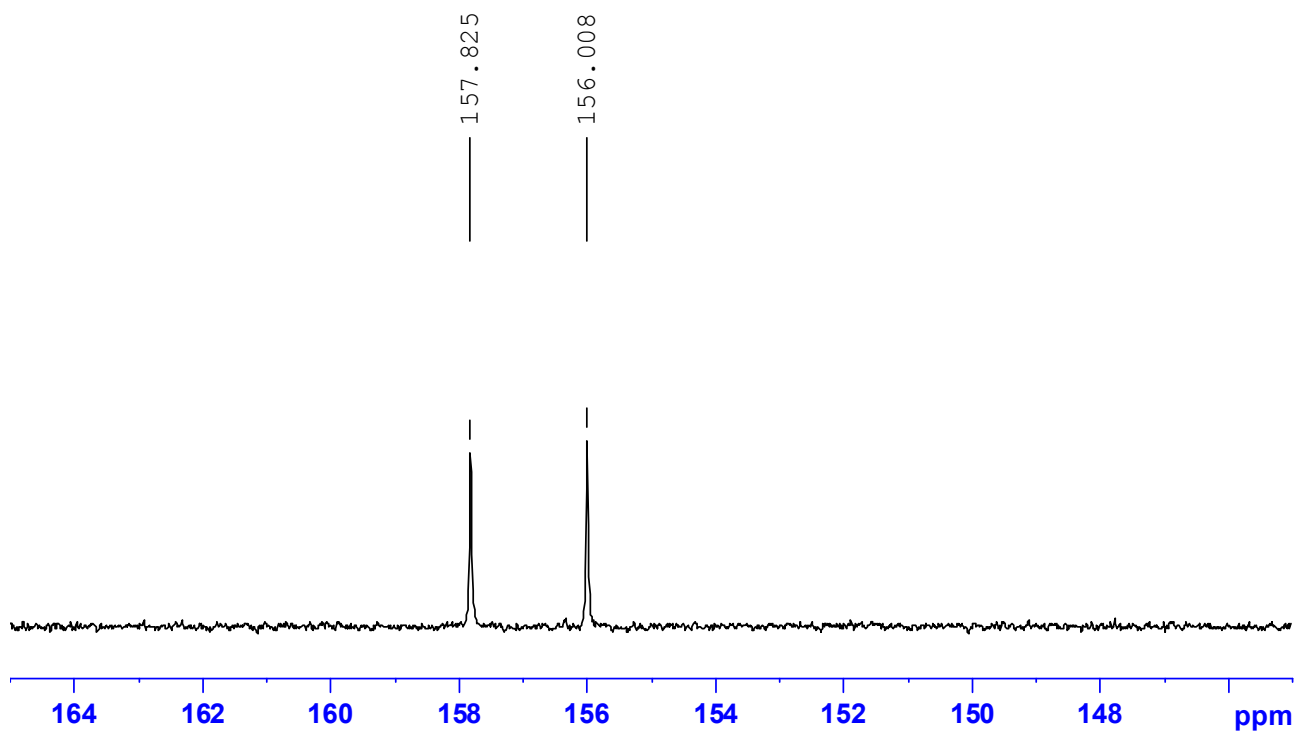

**Figure V:**  $^{31}\text{P}$ -NMR of the complex between  $\text{Rh}(\text{acac})(\text{eth})_2$  (1.0 equiv) and **27**-P(O)-N [(*S*)-binaphthol / (*S,S*)-2,5-diphenylpyrrolidine] (2.0 equiv) in toluene- $d_8$  at 230 K

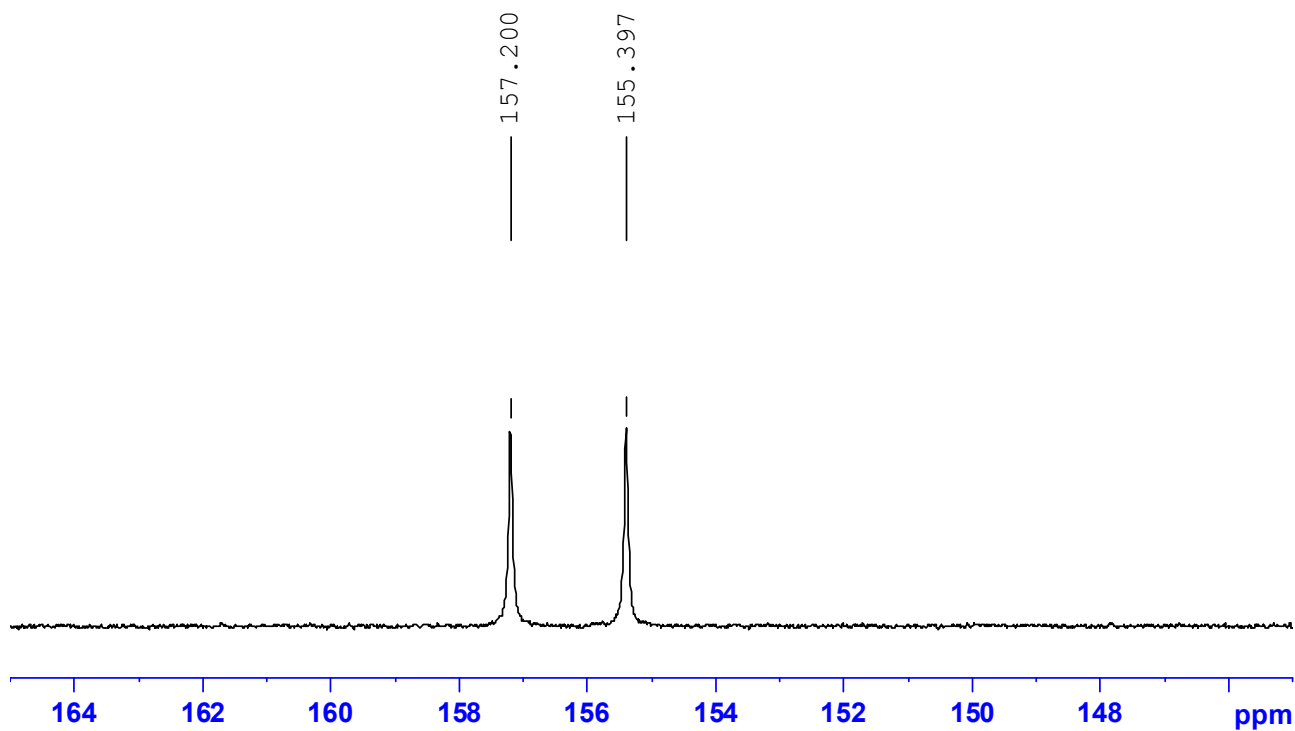

**Procedure for the screening:** in flame-dried flasks, stock solutions were freshly prepared: a 0.006M solution of  $[\text{Rh}(\text{eth})_2\text{Cl}]_2$  (0.024 mmol, 9.33 mg) in degassed dioxane (4 ml); a 1.33M solution of phenyl boronic acid (3.2 mmol, 390.4 mg) in dioxane (2.4 ml); a solution of the 2-cyclohexen-1-one (1.6 mmol, 165.4  $\mu\text{l}$ ) in dioxane (1.6 ml). The reactions were performed using standard Schlenk techniques. Seven flame-dried glass test tubes with stirring bars were placed in a Schlenk, under argon. In each test tube, the ligands (0.06 eq, 0.006 mmol of  $L^a$  and 0.006 mmol of  $L^b$ ) were weighed and 0.5 ml of the stock solution of  $[\text{Rh}(\text{eth})_2\text{Cl}]_2$  (0.015 eq, 0.003 mmol) were added, under argon. After 30 min. under stirring, 0.3 ml of the stock solution of phenyl boronic acid (2 eq, 0.4 mmol) were added, followed by 0.1 ml of a 2M solution of KOH (1 eq, 0.2 mmol) in water and 0.2 ml of the stock solution of 2-cyclohexen-1-one (1 eq, 0.2 mmol). The reaction mixtures were stirred overnight under argon, at room temperature. *n*-Tridecane (0.04 mmol) was added to each test tube, and the reaction mixtures were quenched with a satd. aqueous  $\text{NaHCO}_3$  solution, and extracted with diethyl ether. The crude mixtures in diethyl ether were directly analyzed by GC equipped with a chiral capillary column (MEGADEX DACTBS $\beta$ , diacetyl-*t*-butylsilyl- $\beta$ -cyclodextrin OV 1701, 25 m, film 0.25  $\mu\text{m}$ ), using *n*-tridecane as internal standard: yields and ee's were determined by integration of the GC traces.

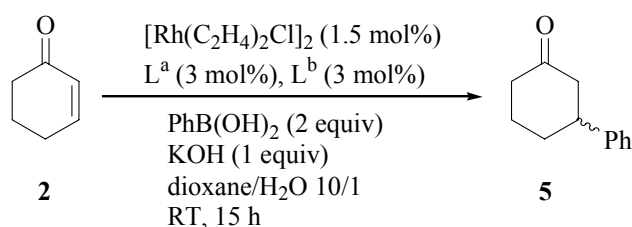

| Entry | Ligand $L^a$           | Ligand $L^b$           | Yield (%) | ee (%) | Abs. Config. |
|-------|------------------------|------------------------|-----------|--------|--------------|
| 1     | 7-P(O) <sub>2</sub> O  | 7-P(O) <sub>2</sub> O  | 100       | 70     | <i>R</i>     |
| 2     | 26-P(O) <sub>2</sub> N | 26-P(O) <sub>2</sub> N | 40        | 40     | <i>R</i>     |
| 3     | 27-P(O) <sub>2</sub> N | 27-P(O) <sub>2</sub> N | 50        | 28     | <i>R</i>     |
| 4     | 7-P(O) <sub>2</sub> O  | 26-P(O) <sub>2</sub> N | 70        | 72     | <i>R</i>     |
| 5     | 7-P(O) <sub>2</sub> O  | 27-P(O) <sub>2</sub> N | 50        | 46     | <i>R</i>     |
